1 **Genome organisation and evolution of a eukaryotic nicotinate co-inducible**  
2 **pathway**

3

4 Eszter Bokor<sup>1+</sup>, Michel Flipphi<sup>2#</sup>, Sándor Kocsubé<sup>1</sup>, Judit Ámon<sup>1</sup>, Csaba Vágvölgyi<sup>1</sup>,  
5 Claudio Scazzocchio<sup>3\*</sup> and Zsuzsanna Hamari<sup>1\*</sup>

6

7 <sup>1</sup>University of Szeged Faculty of Science and Informatics, Department of Microbiology,  
8 Szeged, Hungary

9

10 <sup>2</sup> Institute de Génétique et Microbiologie, Université Paris-Sud, Orsay, France

11

12 <sup>3</sup>Department of Microbiology, Imperial College, London, United Kingdom and  
13 Université Paris-Saclay, CEA, CNRS, Institute for Integrative Biology of the Cell  
14 (I2BC), 91198, Gif-sur-Yvette, France.

15

16

17 #Current Address: Department of Biochemical Engineering, Faculty of Science and  
18 Technology, University of Debrecen, Debrecen, Hungary

19

20 <sup>+</sup> These authors contributed equally

21 <sup>\*</sup> Corresponding authors

22 hamari@bio.u-szeged.hu,

23 c.scazzocchio@imperial.ac.uk

24

## 25 **Abstract**

26 We describe an HxnR-dependent regulon composed of 11 *hxn* genes (*hxnS*, *T*, *R*, *P*, *Y*,  
27 *Z*, *X*, *W*, *V*, *M* and *N*). The regulon is inducible by a nicotinate metabolic derivative and  
28 repressible by ammonium and under stringent control of the GATA factor AreA. This is  
29 the first publication of a eukaryotic, complete nicotinate metabolic cluster including five  
30 novel genes. While in *A. nidulans* the regulon is organised in three distinct clusters, this  
31 organisation is variable in the *Ascomycota*. In some *Pezizomycotina* species all the 11  
32 genes are organised in a single cluster, in other in two clusters. This variable  
33 organisation sheds light on cluster evolution. Instances of gene duplication, followed by  
34 or simultaneous with integration in the cluster; partial or total cluster loss; horizontal  
35 gene transfer of several genes, including an example of whole cluster re-acquisition in  
36 *Aspergillus* of section *Flavi* were detected, together with the incorporation in some  
37 clusters of genes not found in the *A. nidulans* co-regulated regulon, which underlie both  
38 the plasticity and the reticulate character of metabolic cluster evolution. This study  
39 provides the first comprehensive protein sequence comparison of six members of the  
40 cluster across representatives of all *Ascomycota* classes, including several hundreds of  
41 species.

## 42 **Introduction**

43 Nicotinic acid (niacin, vitamin B3), a precursor of NAD and NADP, can be utilised by  
44 some bacteria as sole nitrogen and carbon source. The common first step in all  
45 investigated prokaryotes is the hydroxylation of nicotinic acid (NA) to 6-  
46 hydroxynicotinic acid (6-NA). The further fate of 6-NA is variable; in *Pseudomonas sp.*  
47 [1, 2] it is converted to 2,5-dihydroxypyridine (2,5-DP), in *Bacillus sp.* to 2,6-

48 dihydroxynicotinic acid (2,6-NA) [3] and anaerobically to 1,4,5,6-tetrahydro-6-  
49 oxonicotinic acid in *Eubacterium barkeri* (formerly *Clostridium barkeri*) [4]. The  
50 detailed and variable further bacterial metabolic steps, whether aerobic or anaerobic  
51 have been reviewed in [5].

52 The ascomycete fungus *Aspergillus nidulans* can utilise NA as sole nitrogen source. In  
53 common with bacteria, a molybdenum cofactor (MOCO)-containing flavoprotein  
54 catalyses the conversion of NA to 6-NA (Purine hydroxylase II, previously called  
55 xanthine dehydrogenase II, HxnS [6-9]. The *hxnS* gene is a paralogue of *hxA*, encoding  
56 a canonical xanthine dehydrogenase (HxA, Purine hydroxylase I, [10, 11]) which is co-  
57 regulated with most other genes of the purine utilisation pathway ([12, 13] and  
58 references therein). The substrate specificities of HxA and HxnS have been studied in  
59 detail ([11] and references therein). In *A. nidulans* a NA-inducible co-regulated gene  
60 cluster is extant (*hxn1*/VI cluster, for cluster I in chromosome VI) comprising six genes,  
61 namely, *hxnS*, *hxnR* (encoding the pathway-specific transcription factor), *hxnP* and  
62 *hxnZ* (encoding transporters of the Major Facilitator Superfamily, which could play a  
63 role in the uptake of NA and/or NA-derivatives), a putative flavin oxidoreductase  
64 (*hxnT*) and a  $\alpha$ -ketoglutarate-dependent dioxygenase (*hxnY*) both which may be  
65 involved in the further metabolism of 6-NA [11]. In the 1970s, NA non-utilizer mutants  
66 were isolated and genetically characterised [6]. These map in *hxnS* and *hxnR*, but also in  
67 a second gene cluster in chromosome VI (see below).

68 The *hxn1*/VI genes are specifically induced by a metabolite of NA catabolism but also  
69 by nitrogen starvation ([11] and RNASeq data [14] available at FungiDB). Expression  
70 of the *hxn* genes requires both the pathway-specific Zn-finger factor HxnR and the  
71 wide-domain GATA transcription factor AreA [11]. The latter mediates de-repression  
72 of a wide range of genes in the absence of preferred nitrogen sources (such as

73 ammonium, L-glutamate and L-glutamine) [15-17]. The *hxnR* gene is defined by loss of  
74 function mutations which are non-inducible for the six genes of the cluster (including  
75 *hxnR* itself) and by constitutive mutations where transcription of all *hxnI/VI* genes  
76 occurs in the absence of inducer compounds [11]. The physiological involvement of the  
77 *hxnI/VI* cluster in nicotinate metabolism is further shown by the phenotype of null  
78 mutations in the *hxnR* gene, which result in inability to utilise nicotinate, and two of its  
79 downstream metabolic derivatives as nitrogen sources [11].

80 Hereby we complete the description of the genomic organisation of the nicotinate-  
81 inducible *hxn* genes by the identification of five additional, HxnR-dependent genes in *A.*  
82 *nidulans*, and we describe variations in the genomic organisation of the eleven *hxn*  
83 genes throughout the *Ascomycota* phylum.

84 The evolution of gene clustering in primary metabolism has been a subject of  
85 discussion. Specifically, we do not know which are the factors, which lead to clustering  
86 of previously unclustered genes, those involved in clustering maintenance and those  
87 eventually leading to de-clustering [18]. Rokas and co-workers have proposed that  
88 clustering confers a specific advantage when, in a given metabolic pathway one or more  
89 intermediates are toxic as single gene loss, leading to accumulation of a toxic  
90 metabolite will be minimised [19, 20]. Toxic intermediates, such as 2,5-DP have been  
91 identified in the nicotinate degradation pathway of number of bacteria. Our own work to  
92 be published elsewhere (Bokor E., Amon J., Flipphi M., Vagvolgyi C., Scazzocchio C.  
93 and Hamari Z.) indicates that these intermediates also occur in *A. nidulans*.  
94 Investigating the diverse organisation and evolution of the nicotinate regulon may  
95 contribute to this debate.

96

## 97 Results and Discussion

### 98 Three HxnR dependent, co-inducible gene clusters are extant in *A. nidulans*.

99 In order to search for additional genes involved in nicotinate metabolism we  
100 investigated the cluster structure in available ascomycete genomes (see below for a  
101 thorough description). Strikingly, in *Cyphellophora europaea* (*Pezizomycotina*,  
102 *Eurotiomycetes*, *Chaetothyriales*), five additional genes (to be called *hxnV*, *hxnW*, *hxnX*,  
103 *hxnM* and *hxnN* see below) are positioned between *hxnP* and *hxnR* orthologues, forming  
104 a single, 11-gene cluster that includes all orthologues of the *A. nidulans* *hxnZ*, *hxnY*,  
105 *hxnP*, *hxnR*, *hxnT* and *hxnS* genes [11] (Fig 1, *A. nidulans* cluster 1/VI, table 1). In *A.*  
106 *terreus* (and several other Aspergilli, see below) *hxnV*, *hxnW* and *hxnX* are directly  
107 adjacent to *hxnS* (Fig 1). In *A. nidulans* a cluster including *hxnX*, *hxnW* and *hxnV*  
108 (cluster 2/VI) is ~40 kb distant from *hxnZ* (deduced from the re-assembled genomic  
109 sequences [21]) while *hxnM* and *hxnN* are adjacent to each other in chromosome I  
110 (cluster 3/I). While this article was being written, Martins et al. [22] suggested the  
111 clustered organisation we described for *A. terreus* and *A. nidulans* and drew  
112 comparisons with a number of other species. However, these authors did not investigate  
113 the co-regulation by nicotinate or its metabolites of the putative new *hxn* genes.

114

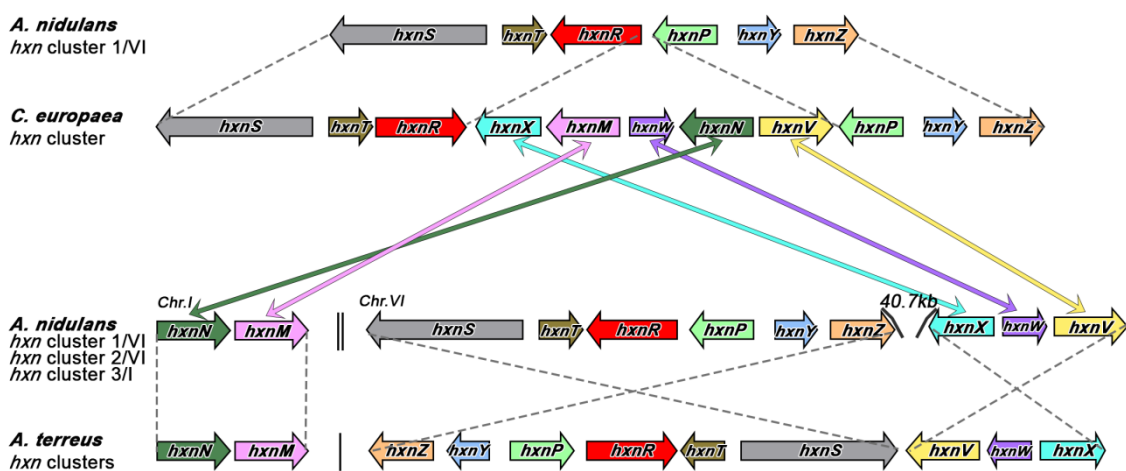

115

116 **Fig 1. Expanded clusters in *Eurotiomycetes* uncover new *hxn* genes.**

117 Comparison of the organisation of known [11] and putative novel *hxn* genes in three  
 118 species: *A. nidulans*, *A. terreus* and *Cyphellophora europaea*. Each orthologous gene is  
 119 symbolised by a thick arrow of a different colour, which also indicates relative  
 120 orientation. Colour-coded double headed arrows connect the 5 new putative *C.*  
 121 *europaea* *hxn* genes to orthologues in the *A. nidulans* genome. Dashed lines connect  
 122 similarly arranged cluster segments in the three species. For *A. nidulans*, a double  
 123 vertical line indicates separation of clusters in different chromosomes (Super-scaffold  
 124 BN001306 for Chromosome VI, BN001301 for Chromosome I). For *A. terreus*, a single  
 125 vertical line separates two distinct contigs (Contig AAJN01000215 for the 9-gene  
 126 cluster, AAJN01000156 for the 2-gene cluster). In *C. europaea*, the 11-gene cluster is  
 127 contained in contig AOBU01000059.

128

129 **Table 1. Results of *in silico* domain analysis of modelled Hxn enzymes**

| gene name /<br>annotation<br>no. / protein<br>length | cDNA<br>accession<br>number<br>(NCBI) | name of identified domains* (identification<br>code / AA interval / e-value)                                                         | proposed<br>enzyme class                            |
|------------------------------------------------------|---------------------------------------|--------------------------------------------------------------------------------------------------------------------------------------|-----------------------------------------------------|
| <b>HxnY</b><br>(AN11188)<br>(349 AAs)                | MT707473<br>this work                 | - PcbC (COG3491, 1-320 AAs, 3.85e-97) /<br>DIOX_N (PF14226, 7-131 AAs, 9.5e-30) /<br>2OG-FeII_Oxy (PF03171, 179-282 AAs,<br>5.8e-22) | $\alpha$ -ketoglutarate<br>dependent<br>dioxygenase |
| <b>HxnT</b><br>(AN9177)<br>(388 AAs)                 | MT707472<br>this work                 | - OYE-like FMN (cd02933, 9-368 AAs,<br>0e+00);<br>- FadH (COG1902, 6-387 AAs, 1.12e-118)                                             | Old Yellow<br>Enzyme                                |
| <b>HxnX</b>                                          | MN718567                              | -UbiH (COG0654, 17-414 AAs, 5.82e-44)                                                                                                | FAD dependent                                       |

|                                       |                         |                                                                                                                                                                                                                                    |                                             |
|---------------------------------------|-------------------------|------------------------------------------------------------------------------------------------------------------------------------------------------------------------------------------------------------------------------------|---------------------------------------------|
| (AN9161)<br>(461 AAs)                 | this work               | -FAD_binding_3 (PF01494, 16-235 AAs, 1.0e-09);                                                                                                                                                                                     | oxidoreductase                              |
| <b>HxnW</b><br>(AN11172)<br>(254 AAs) | MN718568<br>this work   | - adh_short_C2 (PF13561, 13-251 AAs, 1.2e-57);                                                                                                                                                                                     | Enoyl-(acyl carrier protein) reductase-like |
| <b>HxnV</b><br>(AN11187)<br>(620 AAs) | MN718569<br>this work** | - PRK08294 (PRK08294, 7-620 AAs, 2.68e-93)<br>- FAD_binding_3 (PF01494, 23-380 AAs, 3.6e-76) / UbiH (COG0654, 24-373 AAs, 9.70e-43);<br>- PHOX_C (cd02979, 435-616 AAs, 7.26e-18) / Phe_hydrox_dim (PF07976, 404-574 AAs, 2.8e-26) | Phenol 2-monooxygenase-like enzyme          |
| <b>HxnM</b><br>(AN6518)<br>(307 AAs)  | MN718566<br>this work   | - CE4_HpPgda_like (cd10938, 8-287 AAs, 1.+0e-133)<br>- CDA1 (COG0726, 43-145 AAs; 4.03e-21)                                                                                                                                        | C-N bond cleaving hydrolase-like            |
| <b>HxnN</b><br>(AN10833)<br>(543 AAs) | MN718565<br>this work   | - Amidase (PF01425, 78-531 AAs, 8.5e-108)                                                                                                                                                                                          | Amidase                                     |
| <b>HxnP</b><br>(AN11189)<br>(491 AAs) | KX585439<br>this work** | - MFS1 (PF07690.13, 49-417 AAs, 3.2e-37)                                                                                                                                                                                           | Transporter                                 |
| <b>HxnZ</b><br>(AN11196)<br>(533 AAs) | MT707474<br>this work** | - MFS1 (PF07690.13, 89-513 AAs, 4.0e-24)                                                                                                                                                                                           | Transporter                                 |
| <b>HxnR</b><br>(AN11197)              | MT707475<br>this work   | - two C2H2 zinc finger domains (PF00096, 8-32 AAs and 41-63 AAs, 0.029 and 0.7)                                                                                                                                                    | Transcription factor                        |

|                                       |                                 |                                                                                                                                                                                                                                                                                 |                                                                                               |
|---------------------------------------|---------------------------------|---------------------------------------------------------------------------------------------------------------------------------------------------------------------------------------------------------------------------------------------------------------------------------|-----------------------------------------------------------------------------------------------|
|                                       |                                 | - Fungal transcription specific domain<br>(PF04082, 394-668 AAs, 2.0e-36)<br>[11]                                                                                                                                                                                               | [11]                                                                                          |
| <b>HxnS</b><br>(AN9178)<br>(1396 AAs) | KX585438<br>Amon et<br>al. 2017 | - Fer2 (PF14111, 14-82 AAs, 1.5e-06)<br>- Fer2_2 (PF01799, 92-174 AAs, 3.8e-25)<br>- FAD_binding_5 (PF00941, 286-471 AAs,<br>8.9e-43)<br>- CO_deh_flav_C (PF03450, 480-586 AAs,<br>1.5e-30)<br>- Ald_Xan_dh_C2 (PF02738, 755-1296 AAs,<br>6.2e-203)<br>([11] and refs there in) | Xanthine<br>dehydrogenase-<br>type nicotinate<br>dehydrogenase<br>([11] and refs<br>there in) |

130 \* Description of the abbreviated names of protein domains: **PcbC**: Isopenicillin N  
131 synthase and related dioxygenases; **DIOX\_N**: non-haem dioxygenase in morphine  
132 synthesis N-terminal; **2OG-FeII\_Oxy**: 2OG-Fe(II) oxygenase superfamily; **OYE-like**  
133 **FMN**: Old yellow enzyme (OYE)-like FMN binding domain; **FadH**: 2,4-dienoyl-CoA  
134 reductase or related NADH-dependent reductase; **UbiH**: 2-polyprenyl-6-methoxyphenol  
135 hydroxylase and related FAD-dependent oxidoreductases; **FAD\_binding-3**: FAD  
136 binding domain; **PRK08163**: salicylate hydroxylase; **adh\_short\_C2**: Enoyl-(Acyl  
137 carrier protein) reductase; **PRK08294**: phenol 2-monooxygenase; **PHOX\_C**: FAD-  
138 dependent Phenol hydroxylase (PHOX) family, C-terminal TRX-fold domain;  
139 **Phe\_hydrox\_dim**: Phenol hydroxylase, C-terminal dimerisation domain;  
140 **CE4\_HpPgda\_like**: Catalytic domain of *Helicobacter pylori* peptidoglycan  
141 deacetylase (HpPgda) (proposed as cyclic imidase) and similar proteins; **CDA1**:  
142 deacetylase, Pgda/CDA1 family; **MFS1**: Major Facilitator Superfamily; **Fer2** and  
143 **Fer2\_2**: [2Fe-2S] binding domain; **FAD\_binding\_5**: FAD-binding domain;  
144 **CO\_deh\_flav\_C**: CO dehydrogenase flavoprotein C-terminal domain;  
145 **Ald\_Xan\_dh\_C2**: Molybdopterin-binding domain of aldehyde dehydrogenase.  
146 \*\* cDNA analysis revealed that automatic annotation was erroneous and the  
147 experimental determination of cDNA resulted in a corrected gene model  
148

149 The genomic organisation in Chromosome VI confirms data obtained with a mutagenic  
150 screen, which yielded besides mutations in *hxnS* and *hxnR* [11] additional mutants  
151 unable to grow on either NA or 6-NA as sole nitrogen sources. A number of tightly  
152 linked mutations, of which only two (*hxn6* and *hxn7*) are still available, mapped in



153 chromosome VI at about  $\approx 10$  cM from mutations in the *hxnS* and *hxnR* genes, which is  
154 coherent with the genomic organisation described above (Kelly and Scazzocchio,  
155 personal communication).

156 We isolated from a genomic DNA library [23] a plasmid able to complement *hxn6* for  
157 growth on 6-NA as sole nitrogen source. The 8256 bp insert comprises *hxnV*, *hxnW*,  
158 *hxnX* and partial flanking sequences of the AN9159 and AN9162 loci. The *hxn6*  
159 mutation is a G1171A transition within the *hxnV* ORF (see below for correction of the  
160 *hxnV* gene model in S1 Fig) resulting in W296STOP (amber). Southern blots showed  
161 *hxn7* to be a chromosomal aberration (possibly an insertion) interrupting the *hxnV* open  
162 reading frame (S2 Fig). In *A. nidulans*, the *hxnX* gene (cluster 2/VI) is at 40,748 bps  
163 from *hxnZ* (based on re-assembly data [21], while *hxnN* and *hxnM* are adjacent to each  
164 other and transcribed from the same strand in Chromosome I (Cluster 3/I) (Fig 1). We  
165 obtained cDNAs of the genes in the three clusters, and confirmed that, as gathered by  
166 manual inspection and comparative genomics, the database gene models (proposed by  
167 automated annotation) for *hxnP*, *hxnZ* and *hxnV* are erroneous (S1, S3 and S4 Figs for  
168 the correct gene models, Table 1 for accession numbers). HxnX, HxnW, HxnV are  
169 oxidoreductases, while HxnM and HxnN are hydrolases. A summary of the predicted  
170 activities of all the encoded Hxn proteins are shown in table 1. All the genes in cluster  
171 2/VI and 3/I show an HxnR-dependent induction by 6-NA. In an *hxnR<sup>C7</sup>* strain, the  
172 genes in clusters 2/VI and 3/I show variable levels of constitutive expression (Fig 2A),  
173 as shown before for cluster 1/VI [11]. The limits of the newly detected clusters are  
174 demarcated by the completely different pattern of expression of the flanking genes (loci  
175 AN9159 and AN9162 for cluster 2/VI, and loci AN6517 and AN10825 for cluster 3/I;  
176 Fig 2B).

177

178

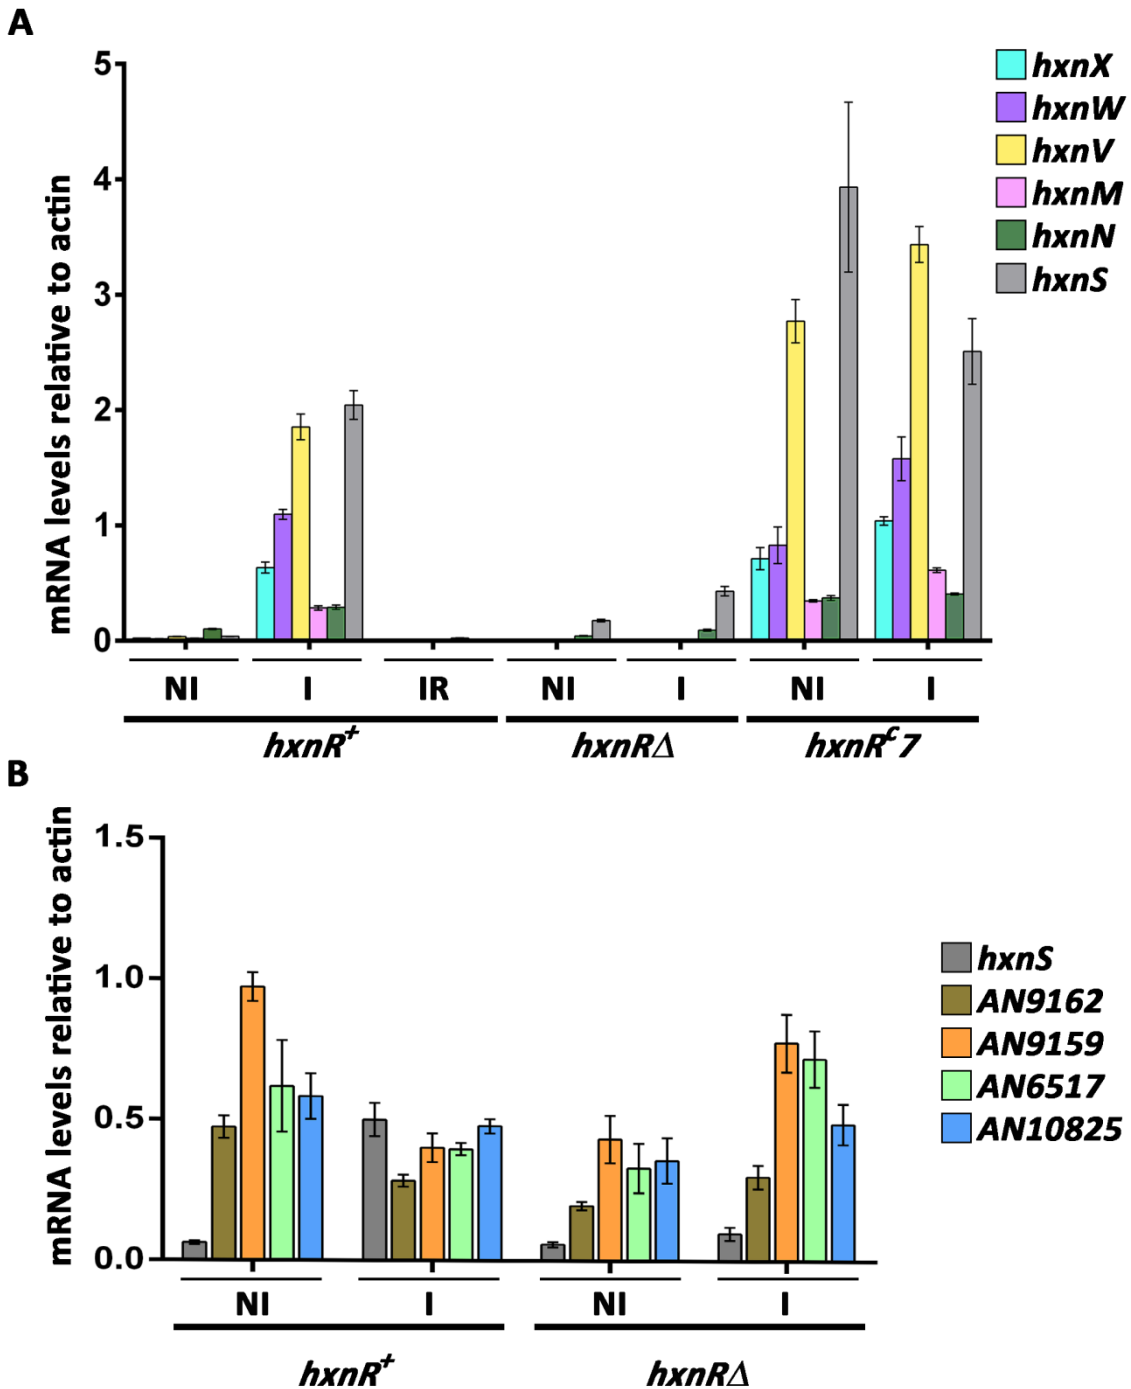

179

180 **Fig 2. HxnR dependent co-induction by 6-NA and ammonium repression of genes**  
181 **in clusters 2/VI and 3/I.**

182 All genes in clusters 2/VI and 3/I (Panel A) and the cognate cluster-flanking genes  
183 (Panel B) were tested together with *hxnS* (in cluster VI/1), which was included as a  
184 positive control of expression. The relative mRNA levels were measured by RT-qPCR

185 and data were processed according to the relative standard curve method [24] with the  
186  $\gamma$ -actin transcript (*actA*/AN6542) as reference. Mycelia were grown on 10 mM  
187 acetamide as sole N-source for 8 h at 37 °C. They were either kept on the same medium  
188 for a further 2 h (non-induced, NI) or induced with 1 mM 6-NA (as the sodium salt, I)  
189 or induced as above together with 5 mM of L-(+)di-ammonium-tartrate (induced-  
190 repressed, IR), also for 2 h. Strains used were *hxnR*<sup>+</sup> (FGSC A26), *hxnR* $\Delta$  (HZS.136)  
191 and *hxnR*<sup>c7</sup> (FGSC A872) (S1 Table). Standard deviations of three independent  
192 experiments are shown. Primers are listed in S2 Table.

193

194 As previously shown for the genes in cluster 1/VI, these five newly identified *hxn* genes  
195 are strongly ammonium repressible (Fig 2A) and with one exception (see below),  
196 strictly dependent on the AreA GATA factor, mediating nitrogen metabolite de-  
197 reposition (Fig 3).

198

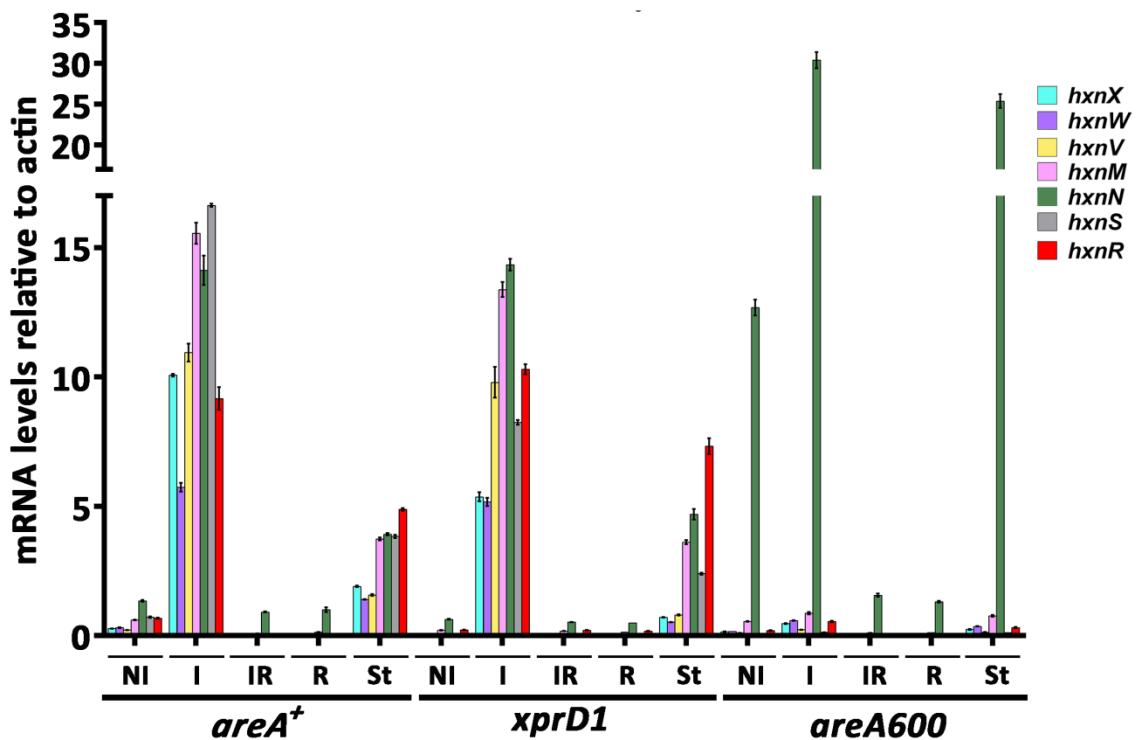

199

200 **Fig 3. The GATA factor AreA is essential for expression of all *hxn* genes with the**  
201 **exception of *hxnN*.**

202 Relative mRNA levels in *areA*<sup>+</sup> (FGSC A26), a supposedly derepressed *areA* mutant  
203 (*xprD1*, HZS.216) and an *areA* null mutant (*areA600*, CS3095) strains were determined  
204 (S1 Table). Non-induced conditions (NI): Strains were grown on MM media with 5 mM  
205 L-(+)-di-ammonium-tartrate as sole N-source for 8 h, then the mycelia were transferred  
206 to MM with 10 mM acetamide for further 2 h. Induced conditions (I): as above but  
207 transferred to 10 mM nicotinic acid as sole N-source. Induced repressed conditions (IR):  
208 transferred to 10 mM nicotinic acid and 5 mM L-(+)-di-ammonium tartrate. N-starvation  
209 conditions (St): transferred to nitrogen-source-free medium. RT-qPCR data were  
210 processed according to the standard curve method [24] with the  $\gamma$ -actin transcript  
211 (*actA/AN6542*) as reference. Standard deviations based on three biological replicates  
212 are shown. Primers are listed in S2 Table.

213

214 The *xprD1* is usually considered to be the most extreme de-repressed allele of the *areA*  
215 regulatory gene [25], however, it did not behave as a de-repressed allele for the  
216 expression of any *hxn* gene but rather as a partial loss of function allele for *hxnS* and  
217 *hxnP* expression [11] while being variable in its effects on the genes in clusters 2/VI and  
218 3/I (Fig 3). A similar behaviour was reported for *ureA* (a urea transporter gene)  
219 expression [26], which strongly suggests that the phenotypes resulting from this specific  
220 mutation are promoter-dependent. The amidase-encoding *hxnN* gene shows a  
221 paradoxical pattern of expression. While it is clearly subject to repression by  
222 ammonium, it is drastically over-expressed in *areA600* background under neutral (non-  
223 induced, non-repressed conditions, see legend to Fig 3), as well as under induced and  
224 nitrogen starvation conditions (Fig 3). As *areA600* is a null mutation due to a chain

225 termination mutation upstream of the DNA binding domain [27], we must conclude that  
226 AreA does not act as a transcriptional activator but as a repressor for *hxnN*. The  
227 apparently paradoxical susceptibility of *hxnN* to ammonium repression is most probably  
228 due to its complete dependence on HxnR, whose expression is drastically repressed by  
229 ammonium ([11] and Figs 2 and 3). We searched the genes in the three clusters for the  
230 consensus AreA 5'HGATAR DNA binding sites [28] (Fig 4). The *hxnV* gene upstream  
231 sequence does not feature canonical AreA sites; nevertheless its expression is  
232 repressible by ammonium, most likely due to indirect repression via repression of *hxnR*  
233 transcription. The *hxnR* upstream region shows both canonical AreA sites and one  
234 putative HxnR binding site (see below). This is consistent with this gene being  
235 inducible, self-regulated and subject to nitrogen metabolite repression ([11] and Fig 2).  
236 The negative effect of AreA on *hxnN* expression may be due to the presence of a  
237 canonical GATA binding motif (5'AGATAA on the non-coding strand at position -14  
238 to -19), interfering with the start or progress of transcription.  
239

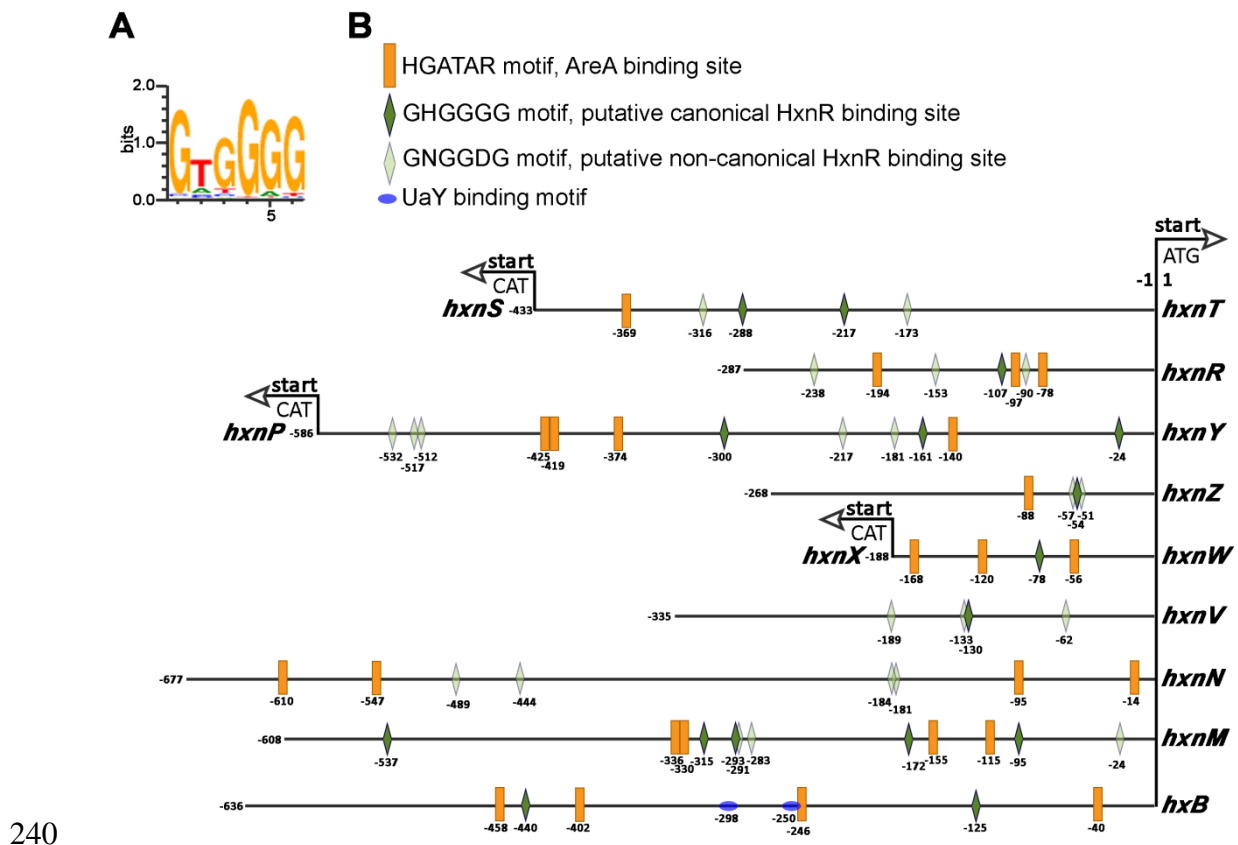

241 **Fig 4. AreA and putative HxnR binding sites are extant in the 11 genes of the *hxn***  
 242 **regulon.**

243 (A) Sequence logo of the DNA binding motif of the HxnR transcription factor generated  
 244 by the “DNA binding site predictor for Cys2His2 Zinc Finger Proteins” application  
 245 (<http://zf.princeton.edu/>) [29]. (B) Distribution of 5’HGATAR AreA binding sites  
 246 (orange boxes) [28] and putative canonical 5’GHGGGG HxnR binding sites (dark green  
 247 lozenges) in *hxn* gene promoters and also in the promoter of the *hxB* gene. The latter  
 248 encodes a trans-sulphurylase necessary for the activity of the MOCO cofactor in  
 249 enzymes of the xanthine oxidoreductase group (including HxnS and HxA). UaY  
 250 binding sites on the *hxB* promoter are marked by blue coloured ovals [30]. Sequences  
 251 conforming to the consensus 5’GHGGGG sequence are present in all HxnR-regulated  
 252 genes, except *hxnN*. Nevertheless, Fig 2 shows clearly that *hxnN* is under the control of  
 253 HxnR. Thus, the physiological binding sites may have a more relaxed consensus  
 254 sequence. We propose 5’GNGGDG motif as a non-canonical consensus binding site

255 that can be found in *hxnN* as well as in other *hxn* promoters. Light green lozenges  
256 indicate the location of the more relaxed consensus 5'GNGGDG motif. Note that the  
257 *hxnT/hxnS*, *hxnP/hxnY* and *hxnX/hxnW* gene couples share bidirectional promoters.

258

259 The binding sites of HxnR have not been experimentally determined, however, they  
260 could be predicted with reasonable probability [29]. Besides the consensus 5'HGATAR  
261 AreA binding sites, Fig 4 shows also the distribution of the putative canonical and non-  
262 canonical HxnR binding sites (5'GHGGGG and 5'GNGGDG, respectively) in all 11  
263 *hxn* genes as well as in the *hxB* gene (AN1637), encoding a MOCO sulphurylase ([31]  
264 for review) necessary for the enzymatic activity of both HxA and HxS [30]. Two  
265 putative canonical HxnR binding sites are extant in the *hxB* promoter (Fig 4). This gene  
266 is under the independent and additive control of UaY (the transcription factor regulating  
267 the purine utilisation pathway) and HxnR [30].

268

269 **Chromosome rearrangements lead to separation of clusters 1/VI and 2/VI in *A.***

270 ***nidulans* and other Aspergilli.**

271 The organisation described above for *A. terreus* (section *Terrei*) is most probably  
272 ancestral to the Aspergilli, as is it seen in species belonging to diverging sections of this  
273 genus (Fig 5 and S5 Fig) namely in *A. carbonarius* (section *Nigri*) and in *A. unguis*, an  
274 early diverging species of section *Nidulantes* (Fig 5 and S5 Fig).

275

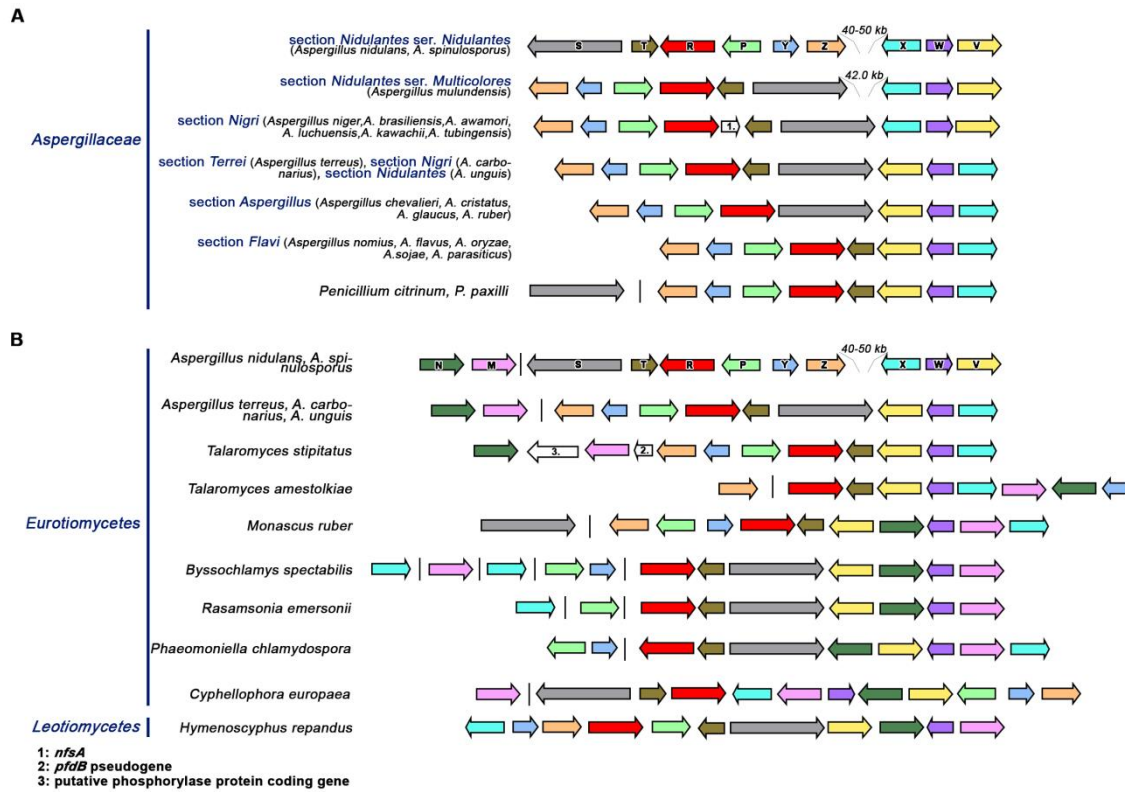

276

277

278 **Fig 5. Genomic arrangement of the *hxn* gene clusters.**

279 (A) *Aspergillaceae* (B) Other *Eurotiomycetes* compared with *Hymenoscyphus repandus*

280 (*Leotiomycetes*, *Helotiales*). Orthologues found in different species are indicated by

281 arrows of the same colour as in Fig 1. A single vertical line symbolises physical

282 separation of genes on different contigs.

283

284 This organisation closely resembles the one seen in species of the basal section

285 *Aspergillus* (*A. ruber*, *A. glaucus*, *A. chevalieri* and *A. cristatus*), where, however, the

286 *hxnT* gene is absent. Within section *Nidulantes*, a first chromosomal inversion resulted

287 in the separation of the clusters 1/VI and 2/VI, inverting the position and orientation of

288 *hxnX*, *hxnW*, and *hxnV* (in cluster 2/VI) in relation to *hxnS* (in cluster 1/VI). This results

289 in *A. mulundensis* in a gap of 41,992 bp between the two clusters (shown in Fig 5,

290 section *Nidulantes*, series *Multicolores* [32]). A second inversion within this taxon led



291 to the configuration seen in *A. nidulans* and its closest sequenced relative *A.*  
292 *spinulosporus* (section *Nidulantes*, series *Nidulantes*) [32] leaving respectively gaps of  
293 40,876 bp and 49,972 bp between *hxnZ* and *hxnX*. *A. sydowii* and *A. versicolor* (section  
294 *Nidulantes*, series *Versicolores*) [32] (S5A Fig), also show separation of clusters 1/VI  
295 and 2/VI, however, the relative gene orientation and phylogenetic position of the latter  
296 two species strongly suggest that this organisation arose from events independent to  
297 those described above for *A. nidulans* and *A. spinulosporus*. Two distinct independent  
298 inversions, like the one described above for *A. mulundensis* must have occurred within  
299 section *Nigri*, leading to the organisation seen in *A. aculeatus* and the *A. niger* clade  
300 (Fig 5 and S5A Fig); in *A. niger* and allied species, *hxnS* and *hxnX* are abutting  
301 neighbours; in *A. aculeatus* (also in section *Nigri*), where *hxnT* is absent there is a ~32  
302 kb gap between these genes.

303 In two species (*A. steynii* and *A. westerdijkiae*) of two closely related series (ser.  
304 *Steyniorum* and ser. *Circumdati*, respectively), clusters 1 and 2 are separated without  
305 any relative change of gene orientation (S5A Fig). This could be formally described as  
306 an insertion, however partial DNA identity and gene synteny in the inter-cluster  
307 sequence rather suggest two successive inversions. In *A. wentii* (section *Cremeri*) a  
308 rearrangement associated with the loss of *hxnS* separates from the original cluster, a  
309 sub-cluster including *hxnZ*, *hxnY*, and a pseudogenised *hxnP*; while *hxnV*, *hxnW* and  
310 *hxnX* are still included in the main cluster together with the neighbouring *hxnT* and  
311 *hxnR*.

312

313 **In the *Pezizomycotina*, with the exception of the *Aspergilli*, the *hxnN* and *hxnM***  
314 **genes are included in the *hxn* cluster.**

315 The enzymes encoded in clusters 1/VI and 2/VI are all oxidoreductase enzymes,  
316 however to release ammonium from NA-derived metabolites, hydrolytic enzymes are  
317 necessary [2]. Within the putative *hxn* clusters of many *Pezizomycotina* species, two  
318 genes encoding respectively a putative cyclic-imide hydrolase (*hxnM* EC 3.5.2.16,  
319 >60% identity with AAY98498, the cyclic imide hydrolase from *Pseudomonas putida*,  
320 [33]) and a putative amidase (*hxnN* EC 3.5.1.4) are extant. The cognate genes of *A.*  
321 *nidulans* have been described above. In *C. europaea*, *hxnN* and *hxnM* lie in between  
322 *hxnX* and *hxnV*, and are separated by *hxnW* constituting two neighbouring, divergently  
323 transcribed gene couples, *hxnV-hxnN* and *hxnW-hxnM* within the cluster (Fig 1). It  
324 should be stressed that these two divergently transcribed couples are conserved across  
325 different classes of the *Pezizomycotina* (S5B Fig), however, not in the genus  
326 *Aspergillus*, where with the exception of section *Flavi*, *hxnN* and *hxnM* are separated  
327 from the main cluster.

328 In *Monascus ruber*, (*Eurotiomycetes*, *Eurotiales*, *Aspergillaceae* - same family as  
329 *Aspergillus*) where *hxnS* is not included in a 10-strong gene cluster (see below), the two  
330 divergently transcribed couples are conserved. In *Talaromyces stipitatus* and *T.*  
331 *islandicus* (*Eurotiales*, *Trichocomaceae*), where *hxnS* is altogether missing) *hxnM* and  
332 *hxnN* are at one terminus of the 10-strong gene cluster. Fig 5 and S5B Fig show a  
333 variety of cluster organisations in species of the *Pezizomycotina* and *Saccharomycotina*  
334 subphyla, with the *hxnN* and *hxnM* genes showing different patterns of integration  
335 within the *hxn* cluster, with however a remarkable conservation of the <*hxnN-hxnV*>  
336 and <*hxnM-hxnW*> divergently transcribed couples in classes of *Pezizomycotina*.

337 In the genome of *C. europaea*, besides the divergently transcribed couples mentioned  
338 above, two other couples are extant,  $\langle hxnS-hxnT \rangle$  and  $\langle hxnP-hxnY \rangle$ . These couples are  
339 mostly conserved in the *Pezizomycotina*, irrespective of whether all eleven genes are  
340 included in a single cluster. Noticeably, in *A. nidulans*, cluster 1/VI comprises  $\langle hxnS-$   
341  $hxnT \rangle$  and  $\langle hxnP-hxnY \rangle$ . In *Hymenoscyphus repandus* (*Leotiomycetes*, *Helotiales*),  
342 similarly to *C. europaea*, all 11 genes are included in a single mega-cluster, albeit in a  
343 different arrangement; nevertheless, two divergent couples are conserved ( $\langle hxnS-hxnT \rangle$   
344 and  $\langle hxnM-hxnW \rangle$ ). A similar conservation of divergently transcribed genes is seen in  
345 other gene clusters, such as the DAL cluster of the *Saccharomycetales*, where the  
346  $\langle DAL4-DAL1 \rangle$  pair is conserved between *S. cerevisiae* and *Naumovia castellii* in spite  
347 of two inversions affecting the budding yeast DAL cluster in chromosome IX [34], and  
348 in the biotin biosynthesis cluster of the *Pezizomycotina* ( $\langle bioF-bioDA \rangle$  [35]. The  
349 persistence of these divergently transcribed couples could be due to the fact that they  
350 share a bi-directional promoter, as established for *GAL10* and *GAL1* in *S. cerevisiae*  
351 ([36, 37] and refs therein) and for *niiA - niaD* in *A. nidulans* [38, 39].

352

### 353 **Evolution of the *hxn* gene cluster(s) in the *Ascomycetes*.**

354 Previous work has shown that HxnS is restricted to the *Pezizomycotina* [11]. Thus, it is  
355 unlikely that other fungi could hydroxylate NA and thus utilise it as a nitrogen source.  
356 However, it is possible that an *hxnS* gene was incorporated into a pre-existent metabolic  
357 pathway, whether catabolic or detoxifying, whether or not organised as a cluster. We  
358 thus investigated the presence of putative *hxn* clustered genes throughout the fungal  
359 kingdom. No putative *hxn* clusters are present in any early divergent fungal lineages in  
360 the *Basidiomycota* or in the *Taphrynomycotina*, except that *hxnT*, *hxnN* and *hxnM*

361 unlinked orthologues are present in the early diverging *Taphrinomycotina*, *Saitoella*  
362 *complicata* (see S5 Fig).

363 Clusters comprising *hxn* genes are present in several scattered species of  
364 *Saccharomycotina* (S5B Fig), however not in the *Saccharomycetaceae* and  
365 *Debaryomycetaceae* families. All species of *Lipomyces*, an early divergent genus of the  
366 *Saccharomycotina*, include *hxnN* and *hxnM* genes (see above). The genomes of fourteen  
367 scattered species of *Saccharomycotina* (S5B Fig) comprise clusters with the *hxn* gene  
368 complement, always including the transcription factor *hxnR* and never including *hxnS*,  
369 *hxnZ*, and *hxnN*, even if the latter gene could be found unlinked to the cluster in an early  
370 divergent species (*Trigonopsis variabilis*). A phylogeny of *hxnR* is shown in  
371 supplementary S6 Fig and is consistent with a monophyletic origin of this gene in the  
372 *Saccharomycotina* and *Pezizomycotina*. It seems most unlikely that the clusters of the  
373 *Saccharomycotina* have a single origin. The *Lipomyces hxnM-hxnN* divergent gene pair  
374 is found only in this genus from where all other *hxn* genes are absent. Among other  
375 families, the occurrence of clusters with variable organisations does not follow any  
376 obvious evolutionary pattern. In the fourteen species of *Saccharomycotina* where we  
377 found an *hxn* cluster, the *hxnT*, *hxnR* and *hxnV* genes, are monophyletic (S5-S8 Figs).  
378 Notwithstanding the above, the phylogeny of *hxnM* suggests several different origins of  
379 clustered *hxnMs* within the *Saccharomycetales* from an un-clustered paralogue, possibly  
380 acquired by HGT (see below, and S9 Fig). One clustering event occurred in the  
381 *Phaffomycetaceae*, possibly two in the *Pichiaceae*, while only one species of the CUG-  
382 Ala clade, *Pachysolen tannophilus* [40] includes an *hxn* cluster, with an *hxnM* gene.  
383 Among the *Pichiaceae*, in the genus *Ogatea*, the monophyletic origin of clustered and  
384 un-clustered *hxnM* genes is supported by their intron exon organisation (S9 Fig).

385 Several instances of gene loss, gene duplication and cluster reorganisation have  
386 occurred in the *Pezizomycotina*. In some *Aspergillus* species, *hxnT* (encoding an FMN  
387 dependent oxidoreductase) is missing from the cluster (S5A Fig) and indeed from the  
388 genome. In many taxa of *Sordariomycetes* duplication of *hxnV* and subsequent loss of  
389 the *hxn* cluster genes can be observed, leaving just the *hxnV* copy and *hxnM*.  
390 It is striking that in the *Aspergillus* section *Flavi*, in *Talaromyces* species and in most  
391 species of *Penicillium* the *hxnS* gene is absent and the organisation of the whole cluster  
392 is completely identical in some species of *Talaromyces*, in most of *Penicillia* and in  
393 *Aspergillus* section *Flavi* (S5 Fig). This coincidence indicates possible HGTs between  
394 these taxons (see below, HGT between *Talaromyces* and *Aspergillus* section *Flavi*). As  
395 the transcription factor-encoding gene *hxnR* is conserved, the implication is that these  
396 organisms should be able to utilise 6-NA but not NA.

397

### 398 **Insertion of additional genes within the *hxn* clusters**

399 We define as "additional genes" those that appear sporadically within the *hxn* clusters of  
400 some taxa. The insertion of a gene encoding a nitro reductase (*nfsA*) originally  
401 horizontally transmitted from a cyanobacterium has been discussed previously [11]; the  
402 insertion occurred after the divergence of *A. carbonarius* from other members of section  
403 *Nigri* [41] (Fig 5 and S5A Fig).

404 In the *hxn* cluster of *Aspergillus* section *Flavi*, and in a number of *Penicillium* and  
405 *Talaromyces* species (S5, S10 and S11 Figs), a gene of unknown function, to be called  
406 *pfdB*, for putative **p**eroxisomal **F**MN-dependent **d**ehydrogenase (see below) lies  
407 between *hxnZ* and *hxnM*. This is a paralogue of *pfdA*, a gene universally present in the  
408 *Pezizomycotina*, which is never included in an *hxn* cluster. The encoded proteins  
409 include PF01070.18 (FMN-dependent dehydrogenase) and PF00173.28 (Cytochrome

410 b5-like binding domain) domains and have a canonical PST1 (peroxisomal entry signal  
411 [42]. The phylogeny of PfdA and PfdB clearly supports a scenario of gene duplication  
412 of *pfda* in the ancestor of Penicillia with simultaneous of subsequent cluster integration  
413 (mean similarity between *A* and *B* paralogues 65% compared with 88% of *A*  
414 orthologues among themselves) (S11 Fig). *pfda* has a second, distinct paralogue, *pfdc*,  
415 too, which however lost the PST1 signal in some cases and are only present in section  
416 *Flavi*, and in a number of *Talaromyces* and *Penicilium* species and in a few species of  
417 other clades (S10 and S11 Figs). The occurrence of PfdC in taxons is consistent with the  
418 duplication of the PfdA ancestor in an early diverging species followed by several  
419 episodes of loss completely unrelated to the evolution of the *hxn* cluster.

420 In *P. paxilli*, *P. citrinum* and *P. steckii*, a gene encoding a protein of 467-469 residues,  
421 comprising a PF00781.24, diacylglycerol kinase catalytic domain, (orthologues  
422 annotated as sphingoid long chain kinases) lies between the *hxnZ* and *hxnM* genes. This  
423 gene is duplication of a gene present elsewhere in these organisms and omnipresent in  
424 the *Eurotiomycetes*. In *Talaromyces stipitatus* a *pfdB* pseudogene is extant between  
425 *hxnZ* and *hxnM*, and additionally, an intron-less gene encoding 751 residue-  
426 multidomain protein, comprising an N terminal PF0104820.11 (phosphorylase  
427 superfamily N-terminal, most similar to nucleoside phosphorylases) domain and a C-  
428 terminal PF05960.11 (bacterial protein of unknown function) domain is located between  
429 *hxnN* and *hxnM*, the nearest homologues of the inserted gene being present and  
430 unlinked to any *hxn* gene in *T. verruculosus*.

431 In *Kregervanrija fluxuum* (*Saccahromycotina*, *Pichiaceae*) a putative amidase gene is  
432 inserted in the cluster between *hxnM* and *hxnT* (S5B Fig). The encoded protein has only  
433 35% identity with *hxnN* of *A. nidulans*, compared with the 51% identity shown by the  
434 genuine HxnN proteins of *Lipomyces starkei*, *Trigonopsis variabilis* and *Saitoella*

435 *complicata*. Its nearest homologue is a putative amidase from *Ogatea parapolyomorpha*  
436 (56% identity). It is tempting to speculate that this amidase has been recruited to the  
437 cluster to carry out a similar catalytical function to that afforded by HxnN.

438

#### 439 **HGT events involving *hxn* genes**

440 In most *Penicillia* and *Talaromyces* species the *hxnS* gene is absent. The un-clustered  
441 *hxnS* genes of *T. islandicus*, *T. piceae*, and *T. wortmanii* have as sister clade the *hxnS* of  
442 *Monascus* species, consistent with standard phylogeny. The phylogeny [11] (S5 and  
443 S12 Figs) together with *hxnS* sequence identity strongly suggests episodes of *hxnS* de-  
444 clustering for these three species. A different situation occurs in *P. citrinum*, *P. paxilli*  
445 and *P. steckii*. These sister species (Section *Citrina*, [43]) have reacquired an un-  
446 clustered *hxnS* gene by HGT from either a *Fusarium* or a *Colletotrichum* species (both  
447 are *Sordariomycetes*, S12 Fig) [11].

448 In all investigated dikarya, HxnM paralogues, presumably non-related to NA  
449 metabolism are extant. Based on comprehensive phylogeny of *hxnM* and its paralogues  
450 (S9 Fig) subjected to reconciliation with the species tree (using GeneRax), we  
451 confirmed HGTs amongst *Ascomycota* taxons and HGT from *Ascomycota* to  
452 *Basidiomycota*. *Dothideomycetes* acquired clustered *hxnM* from *Symbiotaphrina*  
453 (*Xylonomycetes*). Additionally, within the large clade of unclustered *hxnM* genes of the  
454 *Pezizomycotina* a group containing *P. brasillianum* was found as the donor of *hxnM* to  
455 *Aspergillus* section *Usti*. The common ancestor of the *Panellus stipticus* and *Mycena*  
456 *galopus* (*Basidiomycota*) acquired *hxnM* from the common ancestor of the *Fusaria*  
457 (*Ascomycota*). Since these two *Basidiomycetes* have only a single, *Fusaria*-derived  
458 *hxnM* gene, the *Basidiomycota* *hxnM* must necessarily be lost from these species.

459 S9 Fig is consistent with a vertical inheritance of *hxnM* homologues in the dikarya,  
460 excluding a recent HGT from bacteria. The phylogeny of HxnM is compatible with an  
461 originally un-clustered *hxnM* homologue being duplicated, one copy being recruited in  
462 an *hxn* cluster. Within the *Pezizomycotina*, there are two clades including un-clustered  
463 *hxnM* homologues, one (shown by light green highlighting in S9 Fig) is basal to all the  
464 *hxnM* clustered genes in both *Pezizomycotina* and *Saccharomycotina*. In the early  
465 diverging *Lipomyces* (*Lipomycetaceae*, *Saccharomycotina*) genus, *hxnM* and *hxnN* are  
466 clustered and divergently transcribed, and no other putative *hxn* genes are extant.

467 While the clustered *hxnM* genes appear monophyletic, originating from the same clade  
468 of un-clustered genes, clustering in the *Pezizomycotina* occurred independently from  
469 that within the *Saccharomycotina*, followed by several independent instances of  
470 separation of an *hxnN-hxnM* minicluster (such as detailed above for the *Aspergilli*) and  
471 presence of an *hxnM* un-clustered homologue, as it occurred in the *Leotiomycetes*.

472 The clade comprising the HxnM homologues of the *Saccharomycotina* seems  
473 monophyletic. However, it does not occur as expected as a sister clade of all the  
474 homologues of the *Pezizomycotina*, but within the different *Pezizomycotina* clades. The  
475 low aLRT value at the relevant node, however, does not support *Saccharomycotina*  
476 acquiring an *hxnM* gene by HGT from *Pezizomycotina*.

477

478 Reconciliation of the phylogeny of the nicotinate catabolism non-related PfdB found in  
479 *Eurotiomycetes* with the species tree (by using GeneRax) confirmed that the *pfdB* of  
480 *Talaromyces* which was acquired by HGT from an ancestral species of *Penicillia* was  
481 further transferred from a *Talaromyces* by HGT to an ancestor of *Aspergillus* section  
482 *Flavi* (Fig 6). Since all *Penicillia* and *Aspergillus* section *Flavi* share an identical cluster  
483 organisation with some species of *Talaromyces*, the HGT events probably involved two



484 episodes of HGT of the whole *hxn* cluster. This outlines a scenario by which, after the  
485 appearance of *pfdB* by a single gene duplication of *pfdA* in the ancestral species of  
486 Penicillia, *pfdB* subsequently integrated into the cluster in this genus. An HGT of the  
487 whole cluster to an early diverging species of *Talaromyces* would have occurred  
488 followed by a further HGT from *Talaromyces* to the ancestor of *Aspergillus* section  
489 *Flavi*. This scenario implies that the putative acceptor ancestor *Aspergillus* must have  
490 lost previously the cluster present in other Aspergilli. This is strikingly confirmed by  
491 genomes of early diverging species of section *Flavi* (*A. leporis*, *A. aliaceus*, *A.*  
492 *albertensis* and *A. bertholletius*), which show both instances of *hxn* gene loss and  
493 presence of *hxn* pseudogenes (S5A Fig). The most extreme case being that of *A.*  
494 *coremiiformis*, where no *hxn* genes are present. In *A. bertholletius* a cluster of 7 *hxn*  
495 pseudogenes is extant, where the only intact gene is *hxnT* (S5A Fig), however this gene  
496 is not a fossil, but it derives from *Talaromyces* by HGT (S7 Fig). The earliest diverged  
497 species of section *Flavi* is supposed to be *A. avenaceus* [44, 45]. This is fully supported  
498 by the position of the cluster-independent *pfdA* and *pfdC* genes in the phylogenetic tree  
499 (S10 Fig). The cluster of this species, which includes *pfdB*, is similar to that of other  
500 *Flavi*, except that *hxnP* is missing and neither of the two *hxnM* paralogues is included in  
501 the cluster.

502 Reconciliation analysis of HxnT, HxnR and HxnM phylogeny restricted to  
503 *Eurotiomycetes* confirmed the HGT between *Talaromyces* and section *Flavi* only in the  
504 case of HxnR, despite the layout of the phylogenetic trees of HxnM and HxnT were  
505 basically the same as in case of PfdB and HxnR (Fig 6). In spite of contradictory results,  
506 the evidence strongly suggests the whole HG transfer of the cluster as detailed above.

507

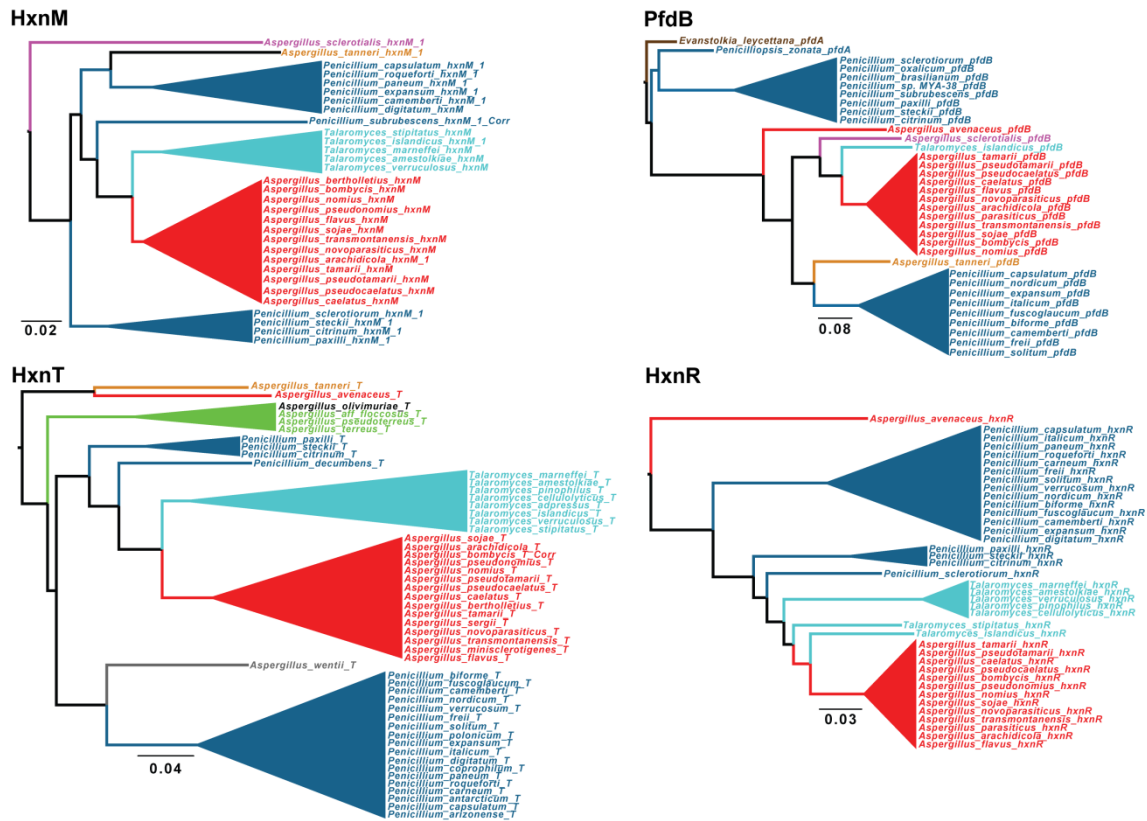

508

509 **Fig 6. HGT from *Talaromyces* to *Aspergillus* section *Flavi* is supported by the**  
 510 **phylogenies of four different proteins based on *Eurotiomycetes* data set (see S6, S7,**  
 511 **S9 and S10 Figs. for the complete phylogenies).**

512 Cyan: *Talaromyces*; Blue: *Penicillium*; Red: *Aspergillus* section *Flavi*; Purple:  
 513 *Aspergillus* section *Polypaecilium*; Light brown: *Aspergillus* section *Tannerorum*;  
 514 Green: *Aspergillus* section *Terrei*; Gray: *Aspergillus* section *Cremei*; Black: *Aspergillus*  
 515 section *Flavipedes*.

516

517 Disturbingly, in the *hxnR*, *hxnV* and *hxnT* phylogenies, *A. avenaceus* appears as out-  
 518 species of the *Talaromyces*/*Penicillium* clade which transferred the cluster to other  
 519 *Flavi* (Fig 6 and S6-S8 figs.). There is obviously a complex series of HGTs which may  
 520 be solved when more genomes of closely related species become available.

521 *A. sclerotialis* (subgenus *Polypaecilum*) has an *hxn* cluster of complex origin. Supported  
522 by phylogeny of HxnS, HxnR, HxnV and HxnT, the corresponding genes derived by  
523 HGT from a *Fusarium* (*Nectria*) species (S6-S8 and S12 Figs). Its cluster includes a  
524 *pfdB* gene, necessarily derived from a *Talaromyces/Penicillium* species. Its clustered  
525 *hxnMI* is sister to the *hxnMI* of *A. tanneri* (see below) (Fig 6, S9 Figs). The most  
526 parsimonious hypothesis is that the complex *hxn* cluster of this species originated in the  
527 confluence of two HGT events, one from a *Fusarium/Nectria* species and another from  
528 a *Talaromyces/Penicillium* species, together with an extensive rearrangement of the  
529 cluster, leading to a unique pattern of gene organisation.

530 *Aspergillus tanneri* belongs to section *Tannerorum*, a sister clade to section *Circumdati*  
531 [32, 43]. In this species two clusters and an isolated *hxnM-hxnN* pair are extant (S5 Fig).  
532 Five enzyme-encoding genes are present in two copies, *hxnV*, *hxnX* and *hxnM*, *hxnS* and  
533 *hxnW*. No *hxnZ*, *hxnY* and *hxnP* genes are extant in *A. tanneri*. The *hxnS* gene present in  
534 both clusters is a product of a recent duplication (S12 Fig). In the larger cluster (7  
535 genes), *pfdB* originates from an HGT from *Talaromyces* or *Penicillium* (Fig 6), most  
536 likely independently from the HGT to section *Flavi*, *hxnVI*, *hxnMI* and *hxnT* genes,  
537 sister to those extant in *A. avenaceus*, are likely of the same origin, while *hxnR* has not  
538 originated from an HGT event (S6-S10 Figs). This is a composite cluster, where HGT  
539 events are coalesced with vertically inherited genes. The smaller cluster includes an  
540 *hxnV2* paralogue beside an *hxnS* paralogue that also originated from a recent duplication  
541 together with an *hxnW* pseudogene (S8 and S12 Figs).

542

### 543 **Concluding remarks**

544 Experimental work has shown that three gene clusters in *A. nidulans* constitute a  
545 nicotinate (actually a nicotinate derivative) inducible regulon, under the control of a

546 specific Zn-finger transcription factor, HxnR. Deletion of HxnR have shown that  
547 expression of some or all of the genes in this regulon are necessary for NA, 6-NA and  
548 the putative intermediate 2,5-dihydroxypyridine utilisation as nitrogen sources [11]. The  
549 specific metabolic function of each encoded protein will be reported separately. This  
550 regulon is extant only in the *Ascomycetes*. The variable organisation seen in different  
551 species includes instances of complete clustering of all 11 genes, which may suggest an  
552 evolutionary pressure towards the global integration of the *hxn* genes, together with  
553 instances of de-clustering such as the separation of clusters 1(VI) and 2(VI) in section  
554 *Nidulantes* of the Aspergilli. Several instances of HGT were detected (Fig 7), most  
555 notably the origin of the cluster of *Aspergillus* section *Flavi* from  
556 *Talaromyces*/Penicillia. The events of HGT, together with the recruitment of genes after  
557 duplication, including *hxnS* and *hxnM*, and additional genes such as *pfdB*, underlies  
558 both the dynamic nature and the reticulate character of metabolic cluster evolution.  
559

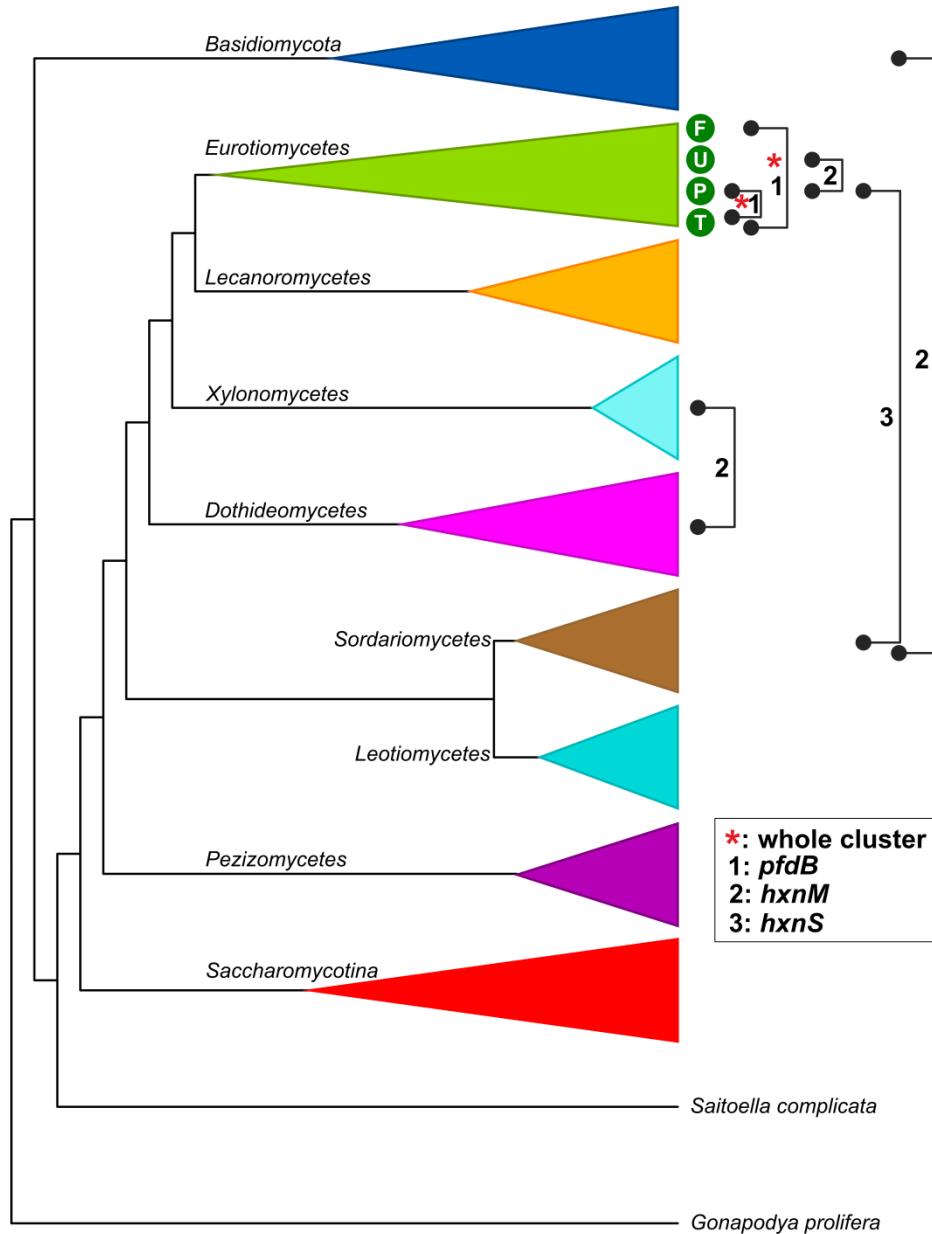

560

561 **Fig 7. Summary of supported HGT events on collapsed species tree related to *pfdB*,**  
562 ***hxnM* and *hxnS* genes.**

563 F: *Aspergillus* section *Flavi*; U: *Aspergillus* section *Usti*; P: Penicillia; T: early  
564 diverging species of *Talaromyces*; 1: HGT of *pfdB* gene found between Penicillia and  
565 species of *Talaromyces* and between species of *Talaromyces* and *Aspergillus* section  
566 *Flavi*; 2: HGTs of *hxnM* gene between *Xylonomycetes* and *Dothideomycetes*, Fusaria  
567 (*Sordariomycetes*) and *Basidiomycota* and between a group of Penicillia containing *P.*

568 *brasilianum* and *Aspergillus* section *Usti*; 3: HGT of *hxnS* gene between *Aspergillus*  
569 section *Usti* and *Penicillia* ; red asterisk: transfer of the whole *hxn* cluster composed of  
570 nine *hxn* genes and including the *pdfB* gene from *Penicillia* to species of *Talaromyces*  
571 and from *Talaromyces* to *Aspergillus* section *Flavi*. Solid lines mark confirmed HGTs.  
572

## 573 **Materials and Methods**

### 574 **Strains and growth conditions**

575 The *A. nidulans* strains used in this work are listed in S1 Table. Standard genetic  
576 markers are described in [http://www.fgsc.net/Aspergillus/gene\\_list/](http://www.fgsc.net/Aspergillus/gene_list/). Minimal media  
577 (MM) contained glucose as the carbon source; the nitrogen source varied according to  
578 the experimental condition [11]. The media were supplemented according to the  
579 requirements of each auxotrophic strain ([www.fgsc.net](http://www.fgsc.net)). Nitrogen sources, inducers and  
580 repressors were used at the following concentrations: 10 mM acetamide, 10 mM  
581 nicotinic acid (1:100 dilution from 1 M nicotinic acid dissolved in 1 M sodium  
582 hydroxide) and 5 mM L-(+)di-ammonium-tartrate as sole N-sources; 1 mM 6-  
583 hydroxynicotinic acid sodium salt as inducer and 5 mM L-(+)di-ammonium-tartrate as  
584 repressor. Growth conditions are detailed in the figure legends of corresponding  
585 experiments.

586

### 587 **RNA manipulation**

588 Total RNA was isolated using a NucleoSpin RNA Plant Kit (Macherey-Nagel) and  
589 RNase-Free DNase (Qiagen) according to the manufacturer's instructions. cDNA  
590 synthesis was carried out with a mixture of oligo-dT and random primers using a  
591 RevertAid First Strand cDNA Synthesis Kit (Fermentas). Quantitative RT-PCR (RT-

592 qPCR) were carried out in a CFX96 Real Time PCR System (BioRad) with SYBR  
593 Green/Fluorescein qPCR Master Mix (Fermentas) reaction mixture (94 °C 3 min  
594 followed by 40 cycles of 94 °C 15 s and 60 °C 1 min). Data processing was done by the  
595 standard curve method [24]. DNA sequencing was done by the Sanger sequencing  
596 service of LGC (<http://www.lgcgroup.com>). Primers used are listed in the S2 Table.

597

## 598 **Data mining**

599 The coding sequences of fungal *hxn* genes (ATG-STOP) were mined by TBLASTN  
600 screening of DNA databases at the NCBI servers, mainly the Whole Genome Shotgun  
601 contigs (WGS) database, using the available on-line tools [46]. For a few species (*N.*  
602 *crassa*, *P. anserina*, *P. chrysogenum*, *A. oryzae*, *A. niger* ATCC 1015, *Leptosphaeria*  
603 *maculans* and some *Saccharomycotina*), the sequence contigs of the published genome  
604 are located in the nr/nt database or the Refseq genome database. Additional *Eurotiales*  
605 genomes (outside *Aspergillaceae*) are publicly accessible at the website of the Centre  
606 for Structural and Functional Genomics (Concordia University Montreal, Canada;  
607 <https://gb.fungalgenomics.ca/portal/>). We also included some species from the 1000  
608 Fungal Genomes Project (<http://1000.fungalgenomes.org>) exclusively available at the  
609 Mycocosm database (Joint Genome Institute, US Department of Energy)  
610 (<https://mycocosm.jgi.doe.gov/mycocosm/home>). For the two classes of *Pezizomycotina*  
611 for which few genome sequences are public (*Xylonomycetes*, *Pezizomycetes*), we have  
612 obtained permission to use the *hxn* complement in the genome sequences of five species  
613 lodged at JGI in our current work: *Symbiotaphrina kochii* (Project ID: 404190);  
614 *Trinosporium guianense* (Project ID: 1040180); *Gyromitra esculenta* (Project ID:  
615 1051239); *Plectania melastoma* (Project ID: 1040543); and *Sarcoscypha coccinea*  
616 (Project ID: 1042915). TBLASTN query sequences for the 11 *hxn* genes were the full-

617 length proteins deduced from the cDNA sequences we experimentally determined for  
618 each of the *A. nidulans hxn* genes (see Table 1 for GenBank Accession numbers).  
619 Where necessary, to confirm gene orthology amongst multiple homologous sequences,  
620 the TBLASTN hits and their surrounding sequences were further inspected for the  
621 conservation of occupied intron positions between species and for synteny with other  
622 *hxn* genes in the sequence contig identified (gene clustering). We did not use the results  
623 of automated annotation (“Models” or “mRNA” at nr/nt) nor did we use deduced  
624 protein databases for the eukaryotic (Hxn) proteins. We used a selection of  
625 autoannotated proteins for the prokaryote HxnM outgroup extracted from the nr/nt  
626 database, using the *Pseudomonas putida* cyclic imide hydrolase (GenBank AAY98498:  
627 [33]) as the BLASTP query. We manually predicted the intron-exon structure of each  
628 (*hxn*) gene, guided by comparative genomics and after (*in silico*) intron removal,  
629 deduced the encoded proteins subsequently used in phylogenetic analyses (see below).  
630 Alternative yeast nuclear codes were utilised where appropriate (*Pachysolen*:  
631 CUG=Ala, *Priceomyces*: CUG=Ser). For some species in under-represented taxa, we  
632 could use the Transcriptome Shotgun Assembly (TSA) database to obtain intronless  
633 sequences coding for full-length protein.

634

### 635 **Construction or Maximum likelihood trees.**

636 Criteria for identification of orthologues/paralogues is detailed for each tree.  
637 Alignments were done with MAFFT G-INS-i unless otherwise indicated, with default  
638 parameters [47, 48] (<https://mafft.cbrc.jp/alignment/server/>). Alignments were trimmed  
639 with BMGE with default parameters unless otherwise indicated  
640 (<https://ngphylogeny.fr/workflows/wkmake/42f42d079b0a46e9>, [49]. Maximum  
641 likelihood trees were constructed with PhyML 3.0. Automatic model selection by SMS



642 (<http://www.atgc-montpellier.fr/phyml> [50, 51]) and drawn with FigTree v 1.4.4.  
643 Values at nodes of all trees are aLRTs (Approximate Likelihood ratio test, [52]). All  
644 trees are shown in a circular cartooned form. Trees are rooted in the specified out group.  
645 Reconciliation was done by GeneRax v1.2.3, a Maximum Likelihood based method  
646 [53] with default settings in 500 replicates. Only those transfers were considered, which  
647 were present in at least 70% of the replicates. Species tree for the reconciliation was  
648 drawn after [54, 55].

649

## 650 **Statements**

651

### 652 Data accessibility

653 The datasets supporting this article are included in the paper and detailed in the  
654 electronic supplementary material tables. Sequences determined by us are available on  
655 GenBank accession numbers: MT707473, MT707472, MN718567, MN718568,  
656 MN718569, MN718566, MN718565, KX585439, MT707474, MT707475.

657

### 658 Authors' contributions

659 ZH and CS conceived the project. EB, ZH and JA contributed to various aspects of the  
660 wet laboratory work; ZH and CS wrote the manuscript. MF discovered the additional  
661 two clusters in *A. nidulans*, manually curated gene models of hxnV, hxnP and hxnZ  
662 orthologs and constructed the schemes of hxn clusters for hundreds of species. CV  
663 contributed to in silico promoter analysis. CS and SK did the phylogenetic analysis. All  
664 authors analysed the results and gave final approval for publication.

665

666 Competing interests

667 We have no competing interests.

668

669 Funding

670 Work was supported by the Hungarian National Research, Development and Innovation

671 Office (NKFIH K16-119516) and by the Hungarian Government (GINOP-2.3.2-15-

672 2016-00012).

673

## 674 **Acknowledgement**

675 JGI sequences used in the construction of the phylogenetic tree were from the US

676 Department of Energy Joint Genome Institute (<http://www.jgi.doe.gov/>) in collaboration

677 with the user community. We thank I. V. Grigoriev for permitting the use of genome

678 sequences included in the 1000 Fungal Genomes project and we thank J. Spatafora, J.

679 Magnuson and R. Gazis for allowing access to the genomes of some individual species

680 prior to publication (Project IDs: 404190, 1040180, 1051239, 1040543 and 1042915).

681 We thank Prof. Joan M. Kelly for allowing us to cite her early genetics work. We thank

682 László G. Nagy for critical comments on the manuscript.

683

## 684 **References**

685 1 Behrman, E. J., Stanier, R. Y. 1957 The bacterial oxidation of nicotinic acid. *The*  
686 *Journal of biological chemistry*. **228**, 923-945.

687 2 Jimenez, J. I., Canales, A., Jimenez-Barbero, J., Ginalski, K., Rychlewski, L., Garcia,

688 J. L., Diaz, E. 2008 Deciphering the genetic determinants for aerobic nicotinic acid

689 degradation: the nic cluster from *Pseudomonas putida* KT2440. *Proceedings of the*  
690 *National Academy of Sciences of the United States of America*. **105**, 11329-11334.  
691 (10.1073/pnas.0802273105  
692 0802273105 [pii])  
693 3 Ensign, J. C., Rittenberg, S. C. 1964 The Pathway of Nicotinic Acid Oxidation by a  
694 *Bacillus* Species. *The Journal of biological chemistry*. **239**, 2285-2291.  
695 4 Alhapel, A., Darley, D. J., Wagener, N., Eckel, E., Elsner, N., Pierik, A. J. 2006  
696 Molecular and functional analysis of nicotinate catabolism in *Eubacterium barkeri*.  
697 *Proceedings of the National Academy of Sciences of the United States of America*. **103**,  
698 12341-12346. (0601635103 [pii]  
699 10.1073/pnas.0601635103)  
700 5 Andreesen, J. R., Fetzner, S. 2002 The molybdenum-containing hydroxylases of  
701 nicotinate, isonicotinate, and nicotine. *Met Ions Biol Syst*. **39**, 405-430.  
702 6 Scazzocchio, C. 1973 The genetic control of molybdoflavoproteins in *Aspergillus*  
703 *nidulans*. II. Use of NADH dehydrogenase activity associated with xanthine  
704 dehydrogenase to investigate substrate and product inductions. *Mol Gen Genet*. **125**,  
705 147-155.  
706 7 Lewis, N. J., Hurt, P., Sealy-Lewis, H. M., Scazzocchio, C. 1978 The genetic control  
707 of the molybdoflavoproteins in *Aspergillus nidulans*. IV. A comparison between purine  
708 hydroxylase I and II. *Eur J Biochem*. **91**, 311-316.  
709 8 Mehra, R. K., Coughlan, M. P. 1984 Purification and properties of purine hydroxylase  
710 II from *Aspergillus nidulans*. *Arch Biochem Biophys*. **229**, 585-595. (0003-  
711 9861(84)90191-7 [pii])

- 712 9 Scazzocchio, C., Holl, F. B., Foguelman, A. I. 1973 The genetic control of  
713 molybdoflavoproteins in *Aspergillus nidulans*. Allopurinol-resistant mutants  
714 constitutive for xanthine-dehydrogenase. *Eur J Biochem.* **36**, 428-445.
- 715 10 Glatigny, A., Scazzocchio, C. 1995 Cloning and molecular characterization of *hxA*,  
716 the gene coding for the xanthine dehydrogenase (purine hydroxylase I) of *Aspergillus*  
717 *nidulans*. *The Journal of biological chemistry.* **270**, 3534-3550.
- 718 11 Amon, J., Fernandez-Martin, R., Bokor, E., Cultrone, A., Kelly, J. M., Flipphi, M.,  
719 Scazzocchio, C., Hamari, Z. 2017 A eukaryotic nicotinate-inducible gene cluster:  
720 convergent evolution in fungi and bacteria. *Open Biol.* **7**, 170199. (170199 [pii]  
721 10.1098/rsob.170199  
722 rsob.170199 [pii])
- 723 12 Scazzocchio, C., Darlington, A. J. 1968 The induction and repression of the enzymes  
724 of purine breakdown in *Aspergillus nidulans*. *Biochimica et biophysica acta.* **166**, 557-  
725 568. (0005-2787(68)90243-8 [pii]  
726 10.1016/0005-2787(68)90243-8)
- 727 13 Gournas, C., Oestreicher, N., Amillis, S., Diallinas, G., Scazzocchio, C. 2011  
728 Completing the purine utilisation pathway of *Aspergillus nidulans*. *Fungal genetics and*  
729 *biology : FG & B.* **48**, 840-848. (10.1016/j.fgb.2011.03.004  
730 S1087-1845(11)00066-1 [pii])
- 731 14 Sibthorp, C., Wu, H., Cowley, G., Wong, P. W., Palaima, P., Morozov, I. Y.,  
732 Weedall, G. D., Caddick, M. X. 2013 Transcriptome analysis of the filamentous fungus  
733 *Aspergillus nidulans* directed to the global identification of promoters. *BMC Genomics.*  
734 **14**, 847. (10.1186/1471-2164-14-847  
735 1471-2164-14-847 [pii])

- 736 15 Arst, H. N., Jr., Cove, D. J. 1973 Nitrogen metabolite repression in *Aspergillus*  
737 *nidulans*. *Mol Gen Genet.* **126**, 111-141. (10.1007/BF00330988)
- 738 16 Wilson, R. A., Arst, H. N., Jr. 1998 Mutational analysis of AREA, a transcriptional  
739 activator mediating nitrogen metabolite repression in *Aspergillus nidulans* and a  
740 member of the "streetwise" GATA family of transcription factors. *Microbiol Mol Biol*  
741 *Rev.* **62**, 586-596.
- 742 17 Scazzocchio, C. 2000 The fungal GATA factors. *Curr Opin Microbiol.* **3**, 126-131.  
743 (S1369-5274(00)00063-1 [pii])
- 744 18 Nutzman, H. W., Scazzocchio, C., Osbourn, A. 2018 Metabolic Gene Clusters in  
745 Eukaryotes. *Annu Rev Genet.* **52**, 159-183. (10.1146/annurev-genet-120417-031237)
- 746 19 McGary, K. L., Slot, J. C., Rokas, A. 2013 Physical linkage of metabolic genes in  
747 fungi is an adaptation against the accumulation of toxic intermediate compounds.  
748 *Proceedings of the National Academy of Sciences of the United States of America.* **110**,  
749 11481-11486. (10.1073/pnas.1304461110  
750 1304461110 [pii])
- 751 20 Rokas, A., Wisecaver, J. H., Lind, A. L. 2018 The birth, evolution and death of  
752 metabolic gene clusters in fungi. *Nat Rev Microbiol.* **16**, 731-744. (10.1038/s41579-  
753 018-0075-3  
754 10.1038/s41579-018-0075-3 [pii])
- 755 21 Wortman, J. R., Gilsenan, J. M., Joardar, V., Deegan, J., Clutterbuck, J., Andersen,  
756 M. R., Archer, D., Bencina, M., Braus, G., Coutinho, P., *et al.* 2009 The 2008 update of  
757 the *Aspergillus nidulans* genome annotation: A community effort. *Fungal Genetics and*  
758 *Biology.* **46**, S2-S13. (10.1016/j.fgb.2008.12.003)

- 759 22 Martins, T. M., Martins, C., Guedes, P., Silva Pereira, C. 2021 Twists and Turns in  
760 the Salicylate Catabolism of *Aspergillus terreus*, Revealing New Roles of the 3-  
761 Hydroxyanthranilate Pathway. *mSystems*. **6**, (e00230-20 [pii]  
762 10.1128/mSystems.00230-20  
763 6/1/e00230-20 [pii])
- 764 23 Osherov, N., May, G. 2000 Conidial germination in *Aspergillus nidulans* requires  
765 RAS signaling and protein synthesis. *Genetics*. **155**, 647-656.
- 766 24 Larionov, A., Krause, A., Miller, W. 2005 A standard curve based method for  
767 relative real time PCR data processing. *BMC Bioinformatics*. **6**, 62. (1471-2105-6-62  
768 [pii]  
769 10.1186/1471-2105-6-62)
- 770 25 Platt, A., Langdon, T., Arst, H. N., Jr., Kirk, D., Tollervey, D., Sanchez, J. M.,  
771 Caddick, M. X. 1996 Nitrogen metabolite signalling involves the C-terminus and the  
772 GATA domain of the *Aspergillus* transcription factor AREA and the 3' untranslated  
773 region of its mRNA. *The EMBO journal*. **15**, 2791-2801.
- 774 26 Abreu, C., Sanguinetti, M., Amillis, S., Ramon, A. 2010 UreA, the major urea/H<sup>+</sup>  
775 symporter in *Aspergillus nidulans*. *Fungal genetics and biology : FG & B*. **47**, 1023-  
776 1033. (10.1016/j.fgb.2010.07.004  
777 S1087-1845(10)00130-1 [pii])
- 778 27 Kudla, B., Caddick, M. X., Langdon, T., Martinez-Rossi, N. M., Bennett, C. F.,  
779 Sibley, S., Davies, R. W., Arst, H. N., Jr. 1990 The regulatory gene *areA* mediating  
780 nitrogen metabolite repression in *Aspergillus nidulans*. Mutations affecting specificity  
781 of gene activation alter a loop residue of a putative zinc finger. *The EMBO journal*. **9**,  
782 1355-1364.

- 783 28 Ravagnani, A., Gorfinkiel, L., Langdon, T., Diallinas, G., Adjadj, E., Demais, S.,  
784 Gorton, D., Arst, H. N., Jr., Scazzocchio, C. 1997 Subtle hydrophobic interactions  
785 between the seventh residue of the zinc finger loop and the first base of an HGATAR  
786 sequence determine promoter-specific recognition by the *Aspergillus nidulans* GATA  
787 factor AreA. *The EMBO journal*. **16**, 3974-3986. (10.1093/emboj/16.13.3974)
- 788 29 Persikov, A. V., Singh, M. 2014 De novo prediction of DNA-binding specificities  
789 for Cys2His2 zinc finger proteins. *Nucleic acids research*. **42**, 97-108.  
790 (10.1093/nar/gkt890  
791 gkt890 [pii])
- 792 30 Amrani, L., Cecchetto, G., Scazzocchio, C., Glatigny, A. 1999 The *hxB* gene,  
793 necessary for the post-translational activation of purine hydroxylases in *Aspergillus*  
794 *nidulans*, is independently controlled by the purine utilization and the nicotinate  
795 utilization transcriptional activating systems. *Molecular microbiology*. **31**, 1065-1073.
- 796 31 Schwarz, G., Mendel, R. R., Ribbe, M. W. 2009 Molybdenum cofactors, enzymes  
797 and pathways. *Nature*. **460**, 839-847. (10.1038/nature08302  
798 nature08302 [pii])
- 799 32 Houbraken, J., Kocsube, S., Visagie, C. M., Yilmaz, N., Wang, X. C., Meijer, M.,  
800 Kraak, B., Hubka, V., Bensch, K., Samson, R. A., *et al.* 2020 Classification of  
801 *Aspergillus*, *Penicillium*, *Talaromyces* and related genera (*Eurotiales*): An overview of  
802 families, genera, subgenera, sections, series and species. *Stud Mycol*. **95**, 5-169.  
803 (10.1016/j.simyco.2020.05.002  
804 S0166-0616(20)30012-9 [pii])
- 805 33 Shi, Y. W., Cui, L. F., Yuan, J. M. 2007 Gene cloning, expression, and substrate  
806 specificity of an imidase from the strain *Pseudomonas putida* YZ-26. *Curr Microbiol*.  
807 **55**, 61-64. (10.1007/s00284-005-0455-6)

- 808 34 Naseeb, S., Delneri, D. 2012 Impact of chromosomal inversions on the yeast DAL  
809 cluster. *PLoS One*. **7**, e42022. (10.1371/journal.pone.0042022  
810 PONE-D-12-15144 [pii])
- 811 35 Magliano, P., Flipphi, M., Sanglard, D., Poirier, Y. 2011 Characterization of the  
812 *Aspergillus nidulans* biotin biosynthetic gene cluster and use of the *bioDA* gene as a  
813 new transformation marker. *Fungal genetics and biology : FG & B*. **48**, 208-215.  
814 (10.1016/j.fgb.2010.08.004  
815 S1087-1845(10)00150-7 [pii])
- 816 36 Johnston, M., Davis, R. W. 1984 Sequences that regulate the divergent GAL1-  
817 GAL10 promoter in *Saccharomyces cerevisiae*. *Molecular and cellular biology*. **4**,  
818 1440-1448. (10.1128/mcb.4.8.1440)
- 819 37 Slot, J. C., Rokas, A. 2010 Multiple GAL pathway gene clusters evolved  
820 independently and by different mechanisms in fungi. *Proceedings of the National*  
821 *Academy of Sciences of the United States of America*. **107**, 10136-10141.  
822 (10.1073/pnas.0914418107  
823 0914418107 [pii])
- 824 38 Punt, P. J., Strauss, J., Smit, R., Kinghorn, J. R., van den Hondel, C. A.,  
825 Scazzocchio, C. 1995 The intergenic region between the divergently transcribed *niiA*  
826 and *niaD* genes of *Aspergillus nidulans* contains multiple NirA binding sites which act  
827 bidirectionally. *Molecular and cellular biology*. **15**, 5688-5699.  
828 (10.1128/mcb.15.10.5688)
- 829 39 Muro-Pastor, M. I., Gonzalez, R., Strauss, J., Narendja, F., Scazzocchio, C. 1999  
830 The GATA factor AreA is essential for chromatin remodelling in a eukaryotic  
831 bidirectional promoter. *The EMBO journal*. **18**, 1584-1597. (10.1093/emboj/18.6.1584)



- 832 40 Shen, X. X., Opulente, D. A., Kominek, J., Zhou, X., Steenwyk, J. L., Buh, K. V.,  
833 Haase, M. A. B., Wisecaver, J. H., Wang, M., Doering, D. T., *et al.* 2018 Tempo and  
834 Mode of Genome Evolution in the Budding Yeast Subphylum. *Cell*. **175**, 1533-1545  
835 e1520. (S0092-8674(18)31332-1 [pii]  
836 10.1016/j.cell.2018.10.023)
- 837 41 Varga, J., Frisvad, J. C., Kocsube, S., Brankovics, B., Toth, B., Szigeti, G., Samson,  
838 R. A. 2011 New and revisited species in *Aspergillus* section *Nigri*. *Stud Mycol.* **69**, 1-  
839 17. (10.3114/sim.2011.69.01)
- 840 42 Gould, S. J., Keller, G. A., Hosken, N., Wilkinson, J., Subramani, S. 1989 A  
841 conserved tripeptide sorts proteins to peroxisomes. *The Journal of cell biology.* **108**,  
842 1657-1664. (10.1083/jcb.108.5.1657)
- 843 43 Steenwyk, J. L., Shen, X. X., Lind, A. L., Goldman, G. H., Rokas, A. 2019 A Robust  
844 Phylogenomic Time Tree for Biotechnologically and Medically Important Fungi in the  
845 Genera *Aspergillus* and *Penicillium*. *mBio.* **10**, (e00925-19 [pii]  
846 10.1128/mBio.00925-19  
847 mBio.00925-19 [pii])
- 848 44 Frisvad, J. C., Hubka, V., Ezekiel, C. N., Hong, S.-B., Novakova, A., Chen, A. J.,  
849 Arzanlou, M., Larsen, T. O., Sklenar, F., Mahakarnchanakul, W., *et al.* 2019 Taxonomy  
850 of *Aspergillus* section *Flavi* and their production of aflatoxins, ochratoxins and other  
851 mycotoxins. *Stud Mycol.* **93**, 1-63. (10.1016/j.simyco.2018.06.001)
- 852 45 Kjaerbolling, I., Vesth, T., Frisvad, J. C., Nybo, J. L., Theobald, S., Kildgaard, S.,  
853 Petersen, T. I., Kuo, A., Sato, A., Lyhne, E. K., *et al.* 2020 A comparative genomics  
854 study of 23 *Aspergillus* species from section *Flavi*. *Nat Commun.* **11**, 1106.  
855 (10.1038/s41467-019-14051-y  
856 10.1038/s41467-019-14051-y [pii])

857 46 Altschul, S. F., Gish, W., Miller, W., Myers, E. W., Lipman, D. J. 1990 Basic local  
858 alignment search tool. *Journal of molecular biology*. **215**, 403-410. (10.1016/S0022-  
859 2836(05)80360-2  
860 S0022-2836(05)80360-2 [pii])  
861 47 Kuraku, S., Zmasek, C. M., Nishimura, O., Katoh, K. 2013 aLeaves facilitates on-  
862 demand exploration of metazoan gene family trees on MAFFT sequence alignment  
863 server with enhanced interactivity. *Nucleic acids research*. **41**, W22-28.  
864 (10.1093/nar/gkt389  
865 gkt389 [pii])  
866 48 Katoh, K., Rozewicki, J., Yamada, K. D. 2019 MAFFT online service: multiple  
867 sequence alignment, interactive sequence choice and visualization. *Brief Bioinform*. **20**,  
868 1160-1166. (10.1093/bib/bbx108  
869 4106928 [pii])  
870 49 Criscuolo, A., Gribaldo, S. 2010 BMGE (Block Mapping and Gathering with  
871 Entropy): a new software for selection of phylogenetic informative regions from  
872 multiple sequence alignments. *BMC Evol Biol*. **10**, 210. (10.1186/1471-2148-10-210  
873 1471-2148-10-210 [pii])  
874 50 Guindon, S., Dufayard, J. F., Lefort, V., Anisimova, M., Hordijk, W., Gascuel, O.  
875 2010 New algorithms and methods to estimate maximum-likelihood phylogenies:  
876 assessing the performance of PhyML 3.0. *Syst Biol*. **59**, 307-321.  
877 (10.1093/sysbio/syq010  
878 syq010 [pii])  
879 51 Lefort, V., Longueville, J. E., Gascuel, O. 2017 SMS: Smart Model Selection in  
880 PhyML. *Mol Biol Evol*. **34**, 2422-2424. (10.1093/molbev/msx149  
881 3788860 [pii])

882 52 Anisimova, M., Gascuel, O. 2006 Approximate likelihood-ratio test for branches: A  
883 fast, accurate, and powerful alternative. *Syst Biol.* **55**, 539-552. (T808388N86673K61  
884 [pii]  
885 10.1080/10635150600755453)

886 53 Morel, B., Kozlov, A. M., Stamatakis, A., Szollosi, G. J. 2020 GeneRax: A Tool for  
887 Species-Tree-Aware Maximum Likelihood-Based Gene Family Tree Inference under  
888 Gene Duplication, Transfer, and Loss. *Mol Biol Evol.* **37**, 2763-2774.  
889 (10.1093/molbev/msaa141  
890 5851843 [pii])

891 54 Shen, X. X., Steenwyk, J. L., LaBella, A. L., Opulente, D. A., Zhou, X., Kominek,  
892 J., Li, Y., Groenewald, M., Hittinger, C. T., Rokas, A. 2020 Genome-scale phylogeny  
893 and contrasting modes of genome evolution in the fungal phylum *Ascomycota*. *Sci Adv.*  
894 **6**, (eabd0079 [pii]  
895 10.1126/sciadv.abd0079  
896 6/45/eabd0079 [pii])

897 55 Prasanna, A. N., Gerber, D., Kijpornyongpan, T., Aime, M. C., Doyle, V. P., Nagy,  
898 L. G. 2020 Model Choice, Missing Data, and Taxon Sampling Impact Phylogenomic  
899 Inference of Deep *Basidiomycota* Relationships. *Syst Biol.* **69**, 17-37.  
900 (10.1093/sysbio/syz029  
901 5486399 [pii])

902 56 Neuberger, G., Maurer-Stroh, S., Eisenhaber, B., Hartig, A., Eisenhaber, F. 2003  
903 Prediction of peroxisomal targeting signal 1 containing proteins from amino acid  
904 sequence. *Journal of molecular biology.* **328**, 581-592. (S002228360300319X [pii]  
905 10.1016/s0022-2836(03)00319-x)  
906  
907

908

## 909 **Supporting information**

910

### 911 **S1 Fig. Exon-intron organisation of the *hxnV* coding region based on cDNA** 912 **sequencing and deduced HxnV protein sequence.**

913 (A) Exon-intron organisation of the coding region deduced through comparison of the  
914 sequenced cDNA with the genomic DNA sequence. Introns (lower case letters) are  
915 highlighted in blue (splice site consensus sequences: 5'-donor, lariat branch point  
916 sequence, and 3'-acceptor) and grey (other intronic sequences). cDNA (GenBank:  
917 MN718569) confirms the gene model. (B) Peptidic HxnV sequence deduced from the  
918 cDNA sequence.

919

### 920 **S1 Table. *A. nidulans* strains used in this work.** (All strains are *veA1* mutant)

921

### 922 **S2 Fig. Analysis of the *hxn7* mutation by Southern blot.**

923 (A) Location of the second *hxn* cluster on chromosome VI (cluster 2/VI, comprising the  
924 *hxnX*, *hxnW* and *hxnV* genes shown as blue, purple and yellow arrows, respectively)  
925 within a 50 kb genomic sequence (part of TPA Accession number BN001306). The  
926 figure shows the cleavage sites of DraI (D), NdeI (Nd), SalI (S), XbaI (X), NcoI (Nc),  
927 PvuII (P) and BamHI (B) restriction endonucleases that were used in Southern blot  
928 analysis (see Panel C). The gene probe used in Southern blots (labelled as a yellow box  
929 above the *hxnV* gene) was a 486 bp fragment of *hxnV* (probe), obtained by using “*hxnV*  
930 AS frw” (cagcgtcaagtctcatatctactg) and “*hxnV* AS rev” (cagagcacgggtacaagaaggtg)  
931 as PCR primers. Yellow arrows above the 50 kb genomic region show, for each enzyme  
932 used, the endonuclease-cleaved fragments that hybridize with the probe. (B) Predicted

933 fragments obtained by restriction of the 50 kb genomic region described above. (C)  
934 Southern blots result with the HZS.145 control (*hxn*<sup>+</sup>) and HZS.697 *hxn7* mutant (*hxn7*)  
935 strains. Southern hybridization was carried out with the DIG-DNA labelling- and  
936 detection kit (Roche) on restriction endonuclease (listed in Panels A and B) digested  
937 total DNA of the *hxn*<sup>+</sup> and *hxn7* strains. M: DIG-labelled DNA Molecular Weight  
938 Marker (Fermentas). The DraI digest excludes that *hxn7* could be a sizeable deletion.  
939 An inversion internal to the ≈15 kb DraI fragment is excluded by several digests such as  
940 BamHI and NdeI. A translocation or more likely an insertion is compatible with the  
941 results shown.

942

943 **S2 Table. Primers used in this work.**

944

945 **S3 Fig. Correction of the gene model for the *A. nidulans hxnP* gene, locus**  
946 **AN11189.**

947 (A) The manually predicted exon-intron organisation of the coding region: introns  
948 (lower case letters) highlighted in grey; donor-, lariat- and acceptor sequences  
949 highlighted in blue. cDNA (accession KX585439) confirms this gene model. (B)  
950 Peptidic sequence of HxnP. The 4th intron splits a Met codon highlighted in purple in  
951 both panels, and this feature is conserved throughout the *Aspergillaceae* as well as in  
952 *Talaromyces*. Both the *Aspergillus* database ([http://www.aspergillusgenome.org/cgi-](http://www.aspergillusgenome.org/cgi-bin/locus.pl?locus=AN11189&organism=A_nidulans_FGSC_A4)  
953 [bin/locus.pl?locus=AN11189&organism=A\\_nidulans\\_FGSC\\_A4](http://www.aspergillusgenome.org/cgi-bin/locus.pl?locus=AN11189&organism=A_nidulans_FGSC_A4)) and the NCBI nr/nt  
954 database (gb|AACD01000170.1|:21152-23003 and gb|BN001306.1|:193501-195352;  
955 locus identifiers AN9176.2 and ANIA\_11189, respectively) feature an erroneous gene  
956 model resulting in an incorrect HxnP protein sequence (accession numbers XP\_682445  
957 and EAA61467; TPA accession number CBF82384).

958

959 **S4 Fig. Exon-intron structure of the *hxnZ* coding region based on cDNA**  
960 **sequencing, and deduced HxnZ protein sequence.**

961 (A) Exon-intron organisation of the coding region deduced through the comparison of  
962 the sequenced cDNA with the genomic DNA sequence. Introns (lower case letters) are  
963 highlighted in grey; the donor-, lariat- and acceptor sequences are highlighted in blue.  
964 cDNA (GenBank: MT707474) confirms this gene model. (B) Peptidic sequence of  
965 HxnZ deduced from the cDNA sequence.

966

967 **S5 Fig. Distribution of *hxn* genes in gene clusters in selected *Eurotiomycetes* (Panel**  
968 **A) and in other classes of *Pezizomycotina* as well as in *Saccharomycotina* (Panel B).**

969 Colour coded arrows indicate specific *hxn* genes and relative gene orientation, as  
970 detailed: *hxnN* (dark green), *hxnM* (pink), *hxnS* (grey), *hxnT* (khaki), *hxnR* (red), *hxnP*  
971 (light green), *hxnY* (mid blue), *hxnZ* (orange), *hxnX* (ice blue), *hxnW* (purple) and *hxnV*  
972 (yellow). A single vertical line symbolises physical separation of *hxn* genes on different  
973 contigs, while a double vertical line symbolises location of genes on different  
974 chromosomes (*A. nidulans*). Grey bar: classes of *Pezizomycotina* subphylum. Purple  
975 bar: class of *Saccharomycotina* subphylum.

976

977 **S6 Fig. Phylogeny of the HxnR transcription factor.**

978 All putative orthologues have the same protein domain organisation as the *A. nidulans*  
979 HxnR protein [11]. HxnR orthologues are > 30 % identical to the *A. nidulans* regulatory  
980 protein outside the N-terminal DNA-binding, zinc finger domain. The “HxnR-like”  
981 proteins are Cys2His2 proteins that appear exclusively in the early divergent class of the  
982 *Pezizomycetes*, and which also are > 30 % identical to *A. nidulans* HxnR (beyond the

983 zinc finger domain). Both *Pezizomycetes* genes have three centrally positioned introns,  
984 the first two of which positions are conserved always flank an exon with 132-138 nt  
985 length. In contrast to the orthologous *hxnR* gene, the “HxnR-like” gene is never  
986 clustered with enzyme or transporter encoding *hxn* genes and occurs in all sequenced  
987 *Pezizomycetes* species, i.e., including those that do not have *hxn* genes (except for *hxnM*  
988 paralogues). Colour code: Purple: *Pezizomycetes*, including "HxnR-like proteins"  
989 serving as an out group; Magenta: *Leotiomycetes*; Brown: *Sordariomycetes*; Orange:  
990 *Dothideomycetes*; Green: *Aspergillus*; Olive Green: *Aspergillus Section Flavi*; Cyan:  
991 *Eurotiomycetes* except *Aspergillus* and *Penicillium*; Darker Cyan: *Penicillium*; Red:  
992 *Saccharomycotina*. Species names in red: those which map outside its cognate  
993 phylogenetic clade, suggesting HGT events.

994

#### 995 **S7 Fig. Phylogeny of the HxnT putative FMN oxidoreductase.**

996 Orthologous HxnT proteins are at least 40-45 % identical to the *A. nidulans* protein and  
997 can be distinguish from other homologue sequences in the genome by the synteny of  
998 *hxn* genes and the conservation of intron positions. The three-exon model of *hxnT* is  
999 broadly conserved. In some taxa, like *Monascus* [11], *hxnT* is duplicated. In such cases,  
1000 we have labelled the protein from the cluster-associated *hxnT* gene, “1”. The tree is  
1001 rooted with the *Saccharomycotina* clade, shown in blue, which also contains the HxnT-  
1002 like protein from the early divergent yeast, *Saitoella complicata* (*Taphrinomycotina*).  
1003 This species lacks the *hxnV* and *hxnX* genes, ubiquitous in all other *Ascomycota* with a  
1004 minimal *hxn* complement. Colour code: Brown: *Sordariomycetes*; Purple:  
1005 *Leotiomycetes*; Orange: *Dothideomycetes*. Other colours: Eurotiomycetes; Cyan: non-  
1006 *Aspergillus*, non-*Penicillium*; Darker Cyan: *Penicillium*; Magenta: *Aspergillus* sections  
1007 *Nidulantes/Versicolores*; Red: section *Flavi*; Green: section *Terrei*. *A. tanneri* (section

1008 *Circumdati*) and *A. wentii* (Section *Cremeri*) are indicated with black lines. Grey: section  
1009 *Nigri*. Species names marked in red indicate an anomalous phylogenetic position,  
1010 suggesting HGT events. *A. bertholletius* is in blue, to distinguish it from the other  
1011 members of section *Flavi*: *hxnT* is in this organism the only gene intact in an *hxn* cluster  
1012 where all other are pseudo genes.

1013

1014 **S8 Fig. Phylogeny of the HxnV putative monooxygenase.**

1015 Orthologous HxnV proteins are 40-45 % identical to the *A. nidulans* protein and can be  
1016 distinguish from other homologue sequences in the genome by the synteny of *hxn* genes  
1017 and the conservation of intron positions. Certain taxa of *Sordariomycetes* have  
1018 duplicated *hxnV* genes: in the smaller clade, the genes that encode the paralogues  
1019 labelled “1” are associated with other *hxn* genes. In the larger clade, the copy of the  
1020 *hxnV* gene for the paralogues labelled “2” are unlinked to resident *hxn* clusters. This  
1021 larger clade also includes several species, token species like *Neurospora crassa*,  
1022 *Magnaporthe oryzae* and *Trichoderma reesei*, that lack the *hxn* system and harbour only  
1023 a lone copy of the *hxnV* gene, suggesting a loss of the nicotinate assimilation pathway  
1024 and probably a novel function for *hxnV* in these *Sordariomycetes*. The tree is rooted in  
1025 the monophyletic HxnV clade of the *Saccharomycotina*. Colour code: Blue:  
1026 *Saccharomycotina*; Purple: *Pezizomycetes*; Magenta: *Leotiomycetes*; Brown:  
1027 *Sordariomycetes*; Black lines *Xylonomycetes*; Orange: *Dothideomycetes*; Cyan: non-  
1028 *Aspergillus*, non-*Penicillium Eurotiomycetes*; Darker Cyan: *Penicillium*; Green:  
1029 *Aspergillus*, except Olive green: section *Flavi*; Red: sections *Nidulantes/Versicolores*.  
1030 Species names in red, those mapping outside their cognate phylogenetic clade  
1031 suggesting HGT events. Species names in blue: those showing a duplication of the *hxnV*  
1032 gene.



1033

1034 **S9 Fig. Maximum Likelihood Phylogeny of the HxnM putative imino-hydrolase**  
1035 **protein.**

1036 All putative HxnM orthologues are >50% identical to the *A. nidulans* HxnM protein and  
1037 >50% identical to the biochemically characterised cyclic imide hydrolase from  
1038 *Pseudomonas putida* (strain YZ-26) (GenBank AAY98498). Methods used in the  
1039 construction of the tree are detailed in the Materials and Methods section. Numbers in  
1040 nodes are aLRTs (approximate Likelihood Ratio Tests). Names of species in black:  
1041 Putative HxnM proteins encoded by genes (*hxnM*) not clustered with any other *hxn*  
1042 gene. Names of species in blue: *hxnM* genes clustered only with *hxnN* genes (e.g., like  
1043 in *A. nidulans*, see Fig 1 or S5 Fig, or in *Lipomyces*). Names of species in red: *hxnM*  
1044 included in a large cluster, encoding  $\geq 4$  genes. Highlighted in yellow: a monophyletic  
1045 clade and putatively iso-functional clade comprising HxnMs from both clustered and  
1046 un-clustered *hxnM* genes. Highlighted in light green: a clade comprising only proteins  
1047 from un-clustered HxnM encoding genes, which appears as the outgroup to all clades  
1048 with HxnMs from clustered genes detailed above. Colour code: Grey: prokaryotic  
1049 outgroup (comprising both Bacterial and Archeal proteins); Blue: *Basidiomycota*  
1050 (phylum); Red: *Saccharomycotina* (subphylum); Other colours: Pezizomycotina taxa;  
1051 namely: Green: Eurotiomycetes; Olive green: *Aspergillus* section *Flavi* to highlight its  
1052 anomalous position (HGT); Brown: *Sordariomycetes*; Magenta: *Dothideomycetes*;  
1053 Orange: *Lecanoromycetes*; Cyan: *Leotiomycetes*; Purple: *Pezizomycetes*.

1054

1055 **S10 Fig. Phylogeny of the PfdA, B, and C paralogues in the Eurotiales.**

1056 The *pfda* gene is ubiquitous in *Pezizomycotina* and encodes a well conserved protein of  
1057 ~ 500 amino acids with a canonical peroxisome targeting sequence PTS-1 at its C-

1058 terminus. Generally, *Eurotiales* PfdAs are >72 % identical to the *A. flavus* protein. The  
1059 *pfdB* and *pfdC* paralogues are restricted to specific taxa of the *Aspergillaceae* or  
1060 *Trichocomaceae* families of the *Eurotiales* order; some species have two- while others  
1061 have all three genes. The *pfdB* gene is regularly but not always, associated with the *hxn*  
1062 gene cluster. The PfdB and C proteins are respectively, >60 % and >50 % identical to *A.*  
1063 *flavus* PfdA. Typically, both paralogues are shorter than ubiquitous PfdA; multiple  
1064 sequence alignments of the three paralogues (from one species) show a distinct gap in  
1065 the middle of the alignment. All PfdAs and PfdBs feature a canonical PTS-1 [56] but  
1066 some PdfCs appear to have lost the canonical signal sequence for peroxisome entry. All  
1067 *Eurotiales* Pfd paralogue proteins included show the same domain organisation and  
1068 their encoding genes have a conserved exon/intron structure with five exons (see Sup.  
1069 Figure S12). In *Aspergillus*, the four introns in *pfdA* are confirmed by non-overlapping  
1070 EST clones accessions DR703303 (introns 1 and 2 near the ATG) and CO136618  
1071 (introns 3 and 4 near the STOP). The exon 2 is always 59 nt long and exon 4 is always  
1072 74 nt long in nearly all Pfd paralogues. The size of the large central exon 3 distinguishes  
1073 *pfdA* from its *B* and *C* paralogues. Tree construction was as detailed in Material and  
1074 Methods, except that a Blosum 30 matrix was used for the BMGE alignment trimming.  
1075 The species involved in the *hxn* cluster transfer (*Penicillium*, *Talaromyces*, *Aspergillus*  
1076 section *Flavi*) are in red. Species names in magenta are *Aspergillus* of sections other  
1077 than *Flavi* which also include a *pfdB* gene in their *hxn* gene clusters. Colour code:  
1078 Green: Outgroups *Pezizomycetes* and *Lecanoromycetes* (all PfdA; these taxa do not  
1079 feature the *pfdBC* paralogues); Cyan: *Eurotiales* other than *Aspergillus* and *Penicillium*;  
1080 Darker Cyan: *Penicillium*; Other colours: sections of the genus *Aspergillus*. Magenta:  
1081 sections *Nidulantes/Versicolores*; Red: section *Flavi*; Orange: sections

1082 *Fumigati/Clavati*; Brown: sections *Terrei/Candidi*; Yellow: section *Aspergillus*; Grey:  
1083 section *Nigri*; Purple: section *Circumdati*.

1084

1085 **S11 Fig. Intron positions in *pfdA*, *pfdB*, and *pfdC* paralogues in *Aspergillus nomius*.**

1086 According to the data of *A. nomius* whole genome sequence project (JNOM000000000,

1087 <https://www.ncbi.nlm.nih.gov/nuccore/JNOM000000000>), all three *pfd* paralogues have

1088 four introns in conserved positions, two near the 5' end of the CDS and two near the 3'.

1089 Introns (lower case letters) are highlighted in blue (splice site consensus sequences: 5'-

1090 donor, lariat branch point sequence, and 3'-acceptor) and grey (other intronic

1091 sequences). The sizes of the small exons 2 and 4 are absolutely conserved throughout

1092 the orthologues. The size of the large central exon 3 distinguishes the three paralogues.

1093 In the ubiquitous *pfdA* gene exon 3 is 30 codons longer than the exon 3 of *pfdB* and 20

1094 codons longer than exon 3 of *pfdC*. The canonical PTS-1 [56] has been lost in some but

1095 not all PfdC paralogues that supports a scenario of gene duplication of *pfdA* with

1096 simultaneous or subsequent cluster integration (mean similarity between *A* and *B*

1097 paralogues 65% compared with 88% of *A* orthologues among themselves). The third

1098 paralogue *pfdC* (mean identity between *A* and *C* paralogues 57%) present in section

1099 *Flavi*, and in a number of *Talaromyces* and *Penicilium* species and in a few species of

1100 other clades (supplementary fig. S11), which is consistent with a basal duplication

1101 followed by several episodes of loss completely unrelated to the evolution of the *hxn*

1102 cluster.

1103

1104 **S12 Fig. Phylogeny of HxnS in the *Pezizomycotina*.**

1105 The tree is shown in a circular, cartoon form. Tree was constructed as indicated in

1106 Materials and Methods, except that MAFFT E-INS-i was used for the alignment. The

1107 HxnS sequences included are from Ámon et al. [11] to which orthologue proteins from  
1108 some more recently published *Aspergillus*, *Penicillium* and *Talaromyces* species were  
1109 added: *A. sclerotiales*, *A. tanneri*, *P. steckii*, *T. wortmannii*, and *T. picheae*. Colour  
1110 code: Blue: Outgroups, including non-fungal xanthine hydroxylases and selected HxA  
1111 orthologues; Purple: *Pezizomycetes*; Magenta: *Leotiomycetes*; Brown: *Sordariomycetes*;  
1112 Black (lines): *Xylonomycetes*; Orange: *Dothideomycetes*; Cyan: non-*Aspergillus*, non-  
1113 *Penicillium Eurotiales* (such as *Talaromyces*); Darker Cyan: *Penicillium* genus; Red:  
1114 Sections *Nidulantes/Versicolores* (also called subgenus *Nidulantes* by Houbraken and  
1115 Samson, 2011); Grey: Section *Nigri*; Green: all other *Aspergilli*. The three *Penicillium*  
1116 species and *Aspergillus sclerotialis*, which cluster together within the *Sordariomycetes*  
1117 are shown in red. The duplicated HxnS sequences of *A. tanneri* are shown in blue. The  
1118 three *Talaromyces* species which conserve HxnS are shown in magenta.  
1119
